## Abstract

19

20

21 Temozolomide (TMZ) is a chemotherapy agent that adds mutagenic adducts to guanine, and is first-line  
22 standard of care for the aggressive brain cancer glioblastoma (GBM). Methyl guanine methyl transferase  
23 (MGMT) is a DNA repair enzyme that can remove O6-methyl guanine adducts prior to the development  
24 of catastrophic mutations, and is associated with TMZ resistance. However, inhibition of MGMT fails  
25 to reverse TMZ resistance. Guanines are essential nucleotides in many DNA and RNA secondary  
26 structures. In several neurodegenerative diseases (NDs), disruption of these secondary structures is  
27 pathogenic. We therefore took a structural view of TMZ resistance, seeking to establish the role of  
28 guanine mutations in disrupting critical nucleotide secondary structures. To test whether these have  
29 functional impacts on TMZ-resistant GBM, we focused on two specific guanine-rich regions: G-  
30 quadruplexes (G4s) and splice sites. Here we report broad sequence- and conformation-based changes  
31 in G4s in acquired or intrinsic TMZ resistant vs. sensitive GBM cells, accompanied by nucleolar stress  
32 and enrichment of nucleolar RNA:DNA hybrids (r-loops). We further show widespread splice-altering  
33 mutations, exon skipping, and deregulation of splicing-regulatory serine/arginine rich (SR) protein  
34 phosphorylation in TMZ-resistant GBM cells. The G4-stabilizing ligand TMPyP4 and a novel inhibitor  
35 of cdc2-like kinases (CLKs) partially normalize G4 structure and SR protein phosphorylation,  
36 respectively, and are preferentially growth-inhibitory in TMZ-resistant cells. Lastly, we report that the  
37 G4- and RNA-binding protein EWSR1 forms aberrant cytoplasmic aggregates in response to acute TMZ  
38 treatment, and these aggregates are abundant in TMZ resistant cells. Preliminary evidence suggests these  
39 cytoplasmic EWSR1 aggregates are also present in GBM clinical samples. This work supports altered  
40 nucleotide secondary structure and splicing deregulation as pathogenic features of TMZ-resistant GBM.  
41 It further positions cytoplasmic aggregation of EWSR1 as a potential indicator for TMZ resistance,  
42 establishes the possibility of successful intervention with splicing modulatory or G4-targeting agents,  
43 and provides a new context in which to study aggregating RNA binding proteins.

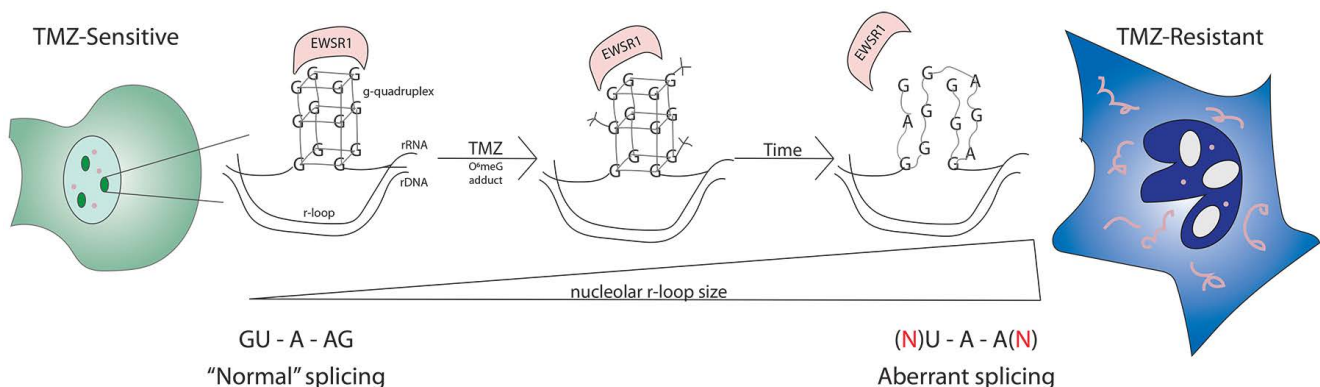

## Introduction

44

45 Recent epidemiological studies show a decrease in cancer-related mortality rates attributable in part to  
46 improved understanding of disease biology and better targeted therapies(Siegel et al., 2019). However,  
47 predictive models show mortality rates for the aggressive brain tumor glioblastoma (GBM) will increase  
48 in 2019(Siegel et al., 2019). GBM is the most commonly diagnosed glioma and has an abysmal overall  
49 survival rate of ~5% at 5 years(Prados et al., 2015; Wen and Kesari, 2008). With a median survival time of  
50 ~15 months, it is uniformly fatal(Nizamutdinov et al., 2018). Temozolomide (TMZ; Temodar) is the FDA-  
51 approved standard of care first line therapy for GBM in combination with surgery and radiation(Mannas  
52 et al., 2014). TMZ causes DNA damage by adding mutagenic adducts to DNA, predominantly O6-methyl  
53 guanine, a lesion that can be repaired by the suicide DNA repair protein methyl guanine methyl  
54 transferase (MGMT)(Tentori and Graziani, 2009). The overall survival benefit provided by TMZ is ~ 4  
55 months, and rapid development of TMZ resistance occurs at least in part through demethylation of the  
56 MGMT promoter, allowing for the expression of MGMT(Zhang et al., 2012). However, efforts to re-  
57 sensitize tumors to TMZ by inhibiting MGMT activity have been unsuccessful(Marsoner et al., 2017).

58 TMZ preferentially targets guanines(Cheung-Ong et al., 2013), critical nucleotides in many DNA  
59 and RNA secondary structures(Hänsel-Hertsch et al., 2017). Two structurally and functionally important  
60 and distinct G-rich regions are G-quadruplexes (G4s) and splice sites. Previous studies have shown g-  
61 quadruplexes (G4s) to be important regulatory elements for oncogenes like *c-MYC*, *KIT*, or *KRAS*(Cogoi  
62 and Xodo, 2006; Fernando et al., 2006; Siddiqui-Jain et al., 2002). These G4s have diverse structural and  
63 physicochemical properties that suggest a high degree of selectivity, and thus G4s may represent a  
64 selective druggable target in multiple cancers(Balasubramanian et al., 2011). In bladder cancer, mutations  
65 that disrupt the repressive G4 structure in the *HRAS* promoter lead to increased expression of HRAS,  
66 and this can be reversed with a G4-decoy that mimics the wild-type promoter sequence(Membrino et al.,  
67 2011).

68 In contrast, studies of the C9orf72 in amyotrophic lateral sclerosis (ALS) show that expansions  
69 of G4 tracts can cause nucleolar stress, deregulate alternative splicing, and alter RNA binding protein  
70 localization(Haeusler et al., 2014). Nucleolar stress, manifested as changes in nucleolar size and  
71 circularity, is a poor prognostic factor in many cancers, including GBM(Stamatopoulou et al., 2018).  
72 Changes in alternative splicing patterns are widespread in GBM, with prior work suggesting that GBM  
73 is “addicted to splicing”(Braun et al., 2017). One family with essential functions in RNA processing in  
74 cancer and neurodegenerative diseases (NDs) is the FET family of proteins, consisting of FUS, EWSR1,  
75 and TAF15(Svetoni et al., 2016). The aggregation-prone properties of the FET proteins have established  
76 FUS as a prototype to study protein aggregation, and as a biomarker for ALS and frontotemporal

77 dementia (FTLD)(Svetoni et al., 2014). EWSR1 has similar aggregation-prone properties(Harrison and  
78 Shorter, 2017) but is more commonly studied as a fusion protein with Fli1 in Ewing's sarcoma(Grünewald  
79 et al., 2015). FET proteins also are involved in DNA repair(Izhar et al., 2015), can bind the G4 secondary  
80 structure of DNA and RNA(Takahama et al., 2011), and play roles in isoform fate(Luo et al., 2015).

81 Here, we exploit the known mechanism of action of TMZ, which causes a mutagenic O6-  
82 methylguanine adduct, to establish the role of guanine mutations in disrupting DNA secondary structures  
83 in GBM and to test whether these mutations have functional impacts on TMZ-resistant GBM that can  
84 be targeted pharmacologically. We found mutations in the G-rich G4s and splice sites which confer  
85 increased responsiveness to a G4 stabilizing drug (TMPyP4) and a novel splicing kinase inhibitor  
86 (CLK2i) in TMZ-resistant cells. We also found a differential stress response to DNA damaging agents  
87 with increased nucleolar RNA:DNA hybrid R-loops, and nucleolar stress. We further identify  
88 mislocalization of the G4- and RNA-binding protein EWSR1, which forms amyloid-like cytoplasmic  
89 aggregates in TMZ-resistant cells that are also identified in GBM clinical specimens. This study  
90 establishes a link between both altered DNA secondary structure and splicing deregulation in TMZ-  
91 resistant GBM, and positions cytoplasmic aggregation of EWSR1 as a potential indicator for TMZ  
92 resistance and potential successful intervention with splicing modulatory or G4-targeting agents.

## 93 **Results**

### 94 **TMZ-induced guanine mutations**

95 Temozolomide (TMZ; Temodar), the FDA-approved standard of care first-line therapy for  
96 glioblastoma (GBM), adds mutagenic adducts to guanine, the most prevalent being O6-methylguanine.  
97 To determine the role of guanine (G) mutations in TMZ-resistance we performed whole genome  
98 sequencing (WGS) on human GBM cell lines that are TMZ-sensitive cells (42MBGA), have acquired  
99 resistant to TMZ through an *in vitro* selection against TMZ (42MBGA-TMZres)(Tiek et al., 2018), or that  
100 are intrinsically TMZ-resistant (T98G). Acquired and intrinsic TMZ-resistant cells had significantly  
101 increased single nucleotide mutations relative to the TMZ-sensitive cells (Fig. 1a). Further analysis  
102 showed G>A, and C>T mutations were most enriched in TMZ-resistant cells (Fig. 1b). These results are  
103 consistent with the previously defined Signature 11 (increased C>T mutations) that is enriched in GBM  
104 patient samples and has a probable association with TMZ treatment(Alexandrov et al., 2013).

105 Two G-rich regions that are functionally and structurally important in cancer are G-quadruplexes  
106 (G4s) and splice sites. G4s can readily be detected by bioinformatic analysis of WGS. To test the  
107 hypothesis that G4 structures would be perturbed in TMZ-resistant cells, we used Quadron, an algorithm  
108 that integrates sequence information to detect tracts of Gs and Cs with characteristic surrounding  
109 sequence features of G4s(Sahakyan et al., 2017). After all G4s were detected, we identified G4 sequences  
110 unique to each cell line, and these unique G4s were then used to identify significantly enriched motifs  
111 using Multiple Em for Motif Elicitation (MEME)(Bailey and Elkan, 1994). In TMZ-sensitive 42MBGA  
112 cells the top three significantly enriched G-rich sequences contain solely G's as hypothesized (Fig. 1c).  
113 However, in the acquired resistant 42MBGA-TMZres we found enrichment of a sequence with higher  
114 representation of A and T's (Sequence 3, Fig. 1c). The T98G line, which is intrinsically resistant and  
115 was not selected in culture with TMZ treatment, showed enrichment of C- and G/A-rich motifs (Fig.  
116 1c). These potential structural changes caused by mutations in G4s in the TMZ-resistant cells were then  
117 validated by immunofluorescence (IF) with the G4-detecting monoclonal antibody BG4. Confirming  
118 prior studies(Biffi et al., 2013) showing BG4 specifically binds DNA G4s *in vivo*, treatment of 42MBGA  
119 cells with DNase I abrogated specific nuclear BG4 staining (Fig. 1d; Supplementary Fig. 1a). In the  
120 TMZ-sensitive 42MGBA cells, discrete nuclear puncta were detected by the BG4 antibody, in addition  
121 to more diffuse nucleolar staining (Fig. 1d; white arrows). In the acute TMZ-treated 42MGBA wild type  
122 (WT) cells and both TMZ-resistant cell lines, there were no longer discrete G4 nuclear puncta, which  
123 corroborated our WGS data (Fig. 1e-g). We then hypothesized that if disruption of G4 sequences played  
124 a functional role in TMZ-resistance, a G4-stabilizing drug may be more effective as a second line  
125 treatment in TMZ-resistant cells (Fig. 1h). Treatment with TMPyP4, a G4-stabilizing drug, caused a

126 slight increase in the punctated BG4 staining pattern in 42MBGA-TMZres cells (Supplementary Fig.  
127 1b,c). In the resistant cell lines, TMPyP4 treatment induced a significant G2/M arrest and decreased cell  
128 proliferation with increased subG1 fraction in the acquired resistant cell line, with had minimal effects  
129 on cell cycle profile and a slight decrease in growth in the TMZ sensitive cell line (Fig. 1 i-k). These  
130 data support the hypothesis that G4-disrupting G mutations have a functional, and potentially targetable,  
131 role in TMZ-resistant GBM.

132

### 133 **Acquired nucleolar changes with TMZ-induced mutations in G-quadruplexes**

134 G4s are abundant in nucleoli, major stress organelles in cells undergoing DNA damage, and nucleoli are  
135 also poor prognostic markers in several cancers, including GBM<sup>24,25</sup>. Nucleoli are formed in part by  
136 regions of 5 acrocentric chromosomes: 13, 14, 15, 21, and 22. Metaphase spreads were previously  
137 performed on 42MBGA vs. 42MBGA-TMZres cell lines which showed an increase in total chromosome  
138 number in the 42MBGA-TMZres cell line(Tiek et al., 2017). We reanalyzed these data to determine if the  
139 acrocentric, or nucleolar-forming, chromosomes were hyper-enriched in the acquired resistant cell line,  
140 and showed the resistant cells had a significantly higher fraction of acrocentric chromosomes compared  
141 to their TMZ-sensitive parental line (Fig. 2a). Next, we adapted the iNO score as a method of quantifying  
142 nucleolar stress that accounts for both size and roundness of nucleoli(Stamatopoulou et al., 2018). Using  
143 IF detection and automated analysis of the nucleolar protein nucleolin (NCL) to determine nucleolar size  
144 and circularity (Fig. 2b), we found significant increases in nucleolar size associated with both acute TMZ  
145 treatment and intrinsic resistance (Fig. 2c), and significant decreases in circularity, or nucleolar  
146 roundness, in acute TMZ treated and both acquired and intrinsic TMZ-resistant nucleoli (Fig. 2d). Within  
147 nucleoli, RNA polymerase I (RNAPI) transcribes ribosomal RNAs (rRNA), which can hybridize to  
148 antisense ribosomal DNA (rDNA) to form rRNA:rDNA R-loops (Lindström et al., 2018). We then used  
149 the R-loop specific antibody S9.6 to visualize nucleolar R-loop changes(König et al., 2017). The TMZ-  
150 sensitive 42MGBA cells showed DNA-damage induced punctated R-loop accumulation throughout the  
151 nucleus(Gorthi et al., 2018) when treated with TMZ (Fig. 2f), compared to the nucleolar staining in  
152 untreated 42MBGA-WT (Fig. 2e). However, TMZ-resistant cell lines showed a robust increase in  
153 nucleolar R-loop accumulation, rather than nucleoplasmic puncta associated with a normal DNA damage  
154 response(Gorthi et al., 2018) (Fig. 2g-i). We validated the specificity of the R-loop antibody, S9.6, by  
155 treating cells with RNase H, which digests R-loops. This treatment abrogated specific nucleolar staining  
156 (Supplementary Fig. 1d). Overall, TMZ-resistant GBM cells exhibit an increase differential nucleolar  
157 stress response with an increase in the number of acrocentric chromosomes and nucleolar size, a decrease  
158 in nucleolar circularity, and differential R-loop staining patterns.

## 159 **CLK2 inhibition preferentially targets TMZ-resistant cells**

160 WGS analysis further identified a significant increase in mutations in the G-rich splice sites in TMZ-  
161 resistant cells (Fig. 3a). Splicing mutations and altered splicing patterns are characteristic of many  
162 cancers, including GBM(Bejar, 2016). To quantify changes in categories of splicing events in the TMZ-  
163 resistant vs sensitive cells, we performed nanopore cDNA sequencing to interrogate full length  
164 transcripts. Using Full-Length Alternative Isoform analysis of RNA (FLAIR(Tang et al.)) and  
165 SUPPA2(Trincado et al., 2018) pipelines, we identified marked enrichment of skipped exons in acquired  
166 and intrinsic TMZ-resistant cells (Fig. 3b). Several splicing factor families drive exon inclusion relative  
167 to exclusion events, including serine/arginine rich proteins (SRs). SR protein activity and localization  
168 are dependent upon their phosphorylation status, which can be altered by DNA damage(Sakashita and  
169 Endo, 2010). We also found that the DNA-damaging TMZ treatment induced a significant decrease in  
170 the phosphorylation of SR proteins (pSRs) in TMZ-sensitive cells where DNA damage was measured  
171 by the presence of the double-strand break marker  $\gamma$ H2AX (Fig. 3c). Dephosphorylation of pSRs was  
172 not observed in either TMZ-resistant cell line post TMZ-treatment (Fig 3c), suggesting altered pSR  
173 function in TMZ-resistant cells. pSRs can bind both introns and exons to determine isoform fate through  
174 exon inclusion or exclusion events, where SR proteins that are not hyperphosphorylated are less  
175 competent to dictate isoform direction(Shepard and Hertel, 2009). Therefore, we sought to phenocopy the  
176 decrease in pSRs caused by TMZ treatment in the sensitive cells by inhibiting a pSR upstream regulator,  
177 the cdc2-like kinases (CLKs), in TMZ-resistant cells. CLKs catalyze the nuclear hyperphosphorylation  
178 of multiple SR proteins(Agarwal et al., 2011), with public data suggesting an association of higher CLK2  
179 expression with poor overall survival and increased grade in brain cancers (Fig. 3d,e). Our acquired and  
180 intrinsic TMZ-resistant GBM cells also showed a robust increase in CLK2 protein expression as  
181 compared to the TMZ-sensitive line (Fig. 3f). Treatment of TMZ-resistant cells with a novel and potent  
182 CLK inhibitor with increased selectivity for CLK2 (GW807982X, referred to as CLK2i) derived from  
183 the Published Kinase Inhibitor Set (PKIS)(Drewry et al., 2014) led to a decrease in SR phosphorylation at  
184 30 minutes (Supplementary Fig. 2a-e(Elkins et al., 2016; Tavares et al., 2004; Wells et al., 2018)), and caused  
185 significant G2/M arrest, apoptosis, and decrease in cell growth selectively in TMZ-resistant cells (Fig.  
186 3g-i). Importantly, CLK2i treatment did not cause significant changes to growth rates or cell cycle, and  
187 only a modest increase in the apoptotic fraction, in the immortalized non-cancerous brain  
188 oligodendrocyte cell line, MO3.13 (Fig. 3g-i). These data support a model in which TMZ-resistant GBM  
189 cells have rewired their splicing regulatory machinery over time, as an increase in CLK2 expression was  
190 not observed following acute TMZ treatment. Therefore, stably TMZ-resistant cells exhibit deregulation

191 of SR protein phosphorylation and CLK2 function, and pharmacological inhibition of CLK2 may  
192 selectively target these alterations in the context of TMZ resistance.

193

### 194 **EWSR1 mislocalization and amyloid-like cytoplasmic aggregation in TMZ-resistant cells and** 195 **GBM clinical specimens**

196 Considering the collective deregulation of G4s, nucleoli, and splicing identified in TMZ resistant GBM  
197 cells, we sought a robust, independent marker that might be an indicator for TMZ resistance and,  
198 potentially, CLK2i efficacy in the future. EWSR1 is member of the FET family of proteins, which also  
199 includes FUS and TAF15, where FUS is an established biomarker in many central nervous system  
200 disorders(Svetoni et al., 2016). EWSR1 can bind DNA G4 structures(Takahama et al., 2011), relocates to  
201 nucleoli following UV-induced DNA damage(Paronetto et al., 2011), and plays key functional roles in  
202 splicing and DNA damage responses(Paronetto et al., 2011). An endogenous basal stain of EWSR1  
203 showed a dramatic difference in staining between TMZ-sensitive vs. resistant cells. The nuclear staining  
204 in TMZ-sensitive cells was in marked contrast to both the nuclear and cytoplasmic amyloid-like  
205 aggregates, with a reversed image to better visualize the cytoplasmic staining, seen in acute TMZ-treated  
206 and resistant cells (Fig. 4a). However, overall expression of EWSR1 did not increase with TMZ  
207 resistance (Fig. 4d). Cytoplasmic EWSR1 aggregates were validated by a second antibody from a  
208 different vendor and host species (Supplementary Fig. 3a). We used high resolution stimulated emission  
209 depletion (STED) microscopy to better resolve the structure of these aggregates, which showed discrete  
210 protein puncta within the cytoplasmic aggregates in both TMZ-resistant cell lines (Fig. 4b,c), and  
211 confirmed that the amyloid-like aggregates were specific to the cytoplasm, but not present in the nucleus  
212 (Supplementary Fig. 3b-f).

213         Cytoplasmic aggregation of EWSR1 could suggest a potential role for RNA buffering, a defining  
214 feature of mis-localized RNA binding proteins in neurodegenerative diseases(Maharana et al., 2018)  
215 where lower RNA concentration in the cytoplasm has been hypothesized to allow the aggregation of  
216 these proteins. As EWSR1 has already been shown to relocate to the nucleoli under stressed conditions,  
217 we sought to decrease the local RNA concentration and cause a stress response with low dose  
218 Actinomycin D (ActD) treatment to test both the new stress response and potential role of RNA in  
219 EWSR1 aggregation. Low dose ActD treatment led EWSR1 to accumulate around the nucleoli, which  
220 is denoted by R-loops (Fig. 4e). STED imaging of these structures better resolved EWSR1, with  
221 42MBGA cells showing a horseshoe shaped staining pattern that did not link to each other (Fig. 4f). By  
222 contrast, EWSR1 formed a linked structure between the droplets in both the acquired and intrinsic TMZ-  
223 resistant cells (Fig. 4g,h). This further suggested a role for RNA buffering in EWSR1 aggregation. The



224 TMZ-resistant cells showed EWSR1 to form protein strands with decreased local RNA concentration in  
225 the nucleoli, which should be studied further in the future. In addition, dual staining of EWSR1 and DNA  
226 G4s showed colocalization in the TMZ-sensitive cell line that was abrogated with TMZ resistance  
227 (Supplementary Fig. 4a-c), further suggesting that the deregulation of G4s identified in TMZ -resistant  
228 cells (Fig. 1e-g) can disrupt the localization of G4-binding proteins like EWSR1. However, EWSR1  
229 amyloid-like aggregates do not drive or maintain TMZ-resistance, as knockdown of EWSR1 had  
230 minimal effects on cell cycle profile or specific cell death in TMZ-resistant cells (Supplementary Fig.  
231 5a-e). We further used Leptomycin B (LMB), an inhibitor of the nuclear export protein CRM1, to show  
232 that EWSR1 was efficiently trafficked to and from the cytoplasm in both TMZ-sensitive and -resistant  
233 lines (Supplementary Fig 5f-h). Ectopically expressed, YFP-tagged EWSR1 caused non-endogenous  
234 ribbon-like formation of EWSR1 in the cytoplasm in the TMZ-resistant cell lines, preventing further  
235 overexpression experiments (Supplementary Fig. 5i,j) and there were no significant changes in EWSR1  
236 or CLK2 isoform profile (Supplementary Fig. 6a-d). Overall these studies suggest that EWSR1 is the  
237 first, to our knowledge, amyloid-like aggregating protein in GBM, where RNA buffering and  
238 deregulation of G4 structures may play a role in its aggregation.

239 A key limitation of studies conducted in cell culture is their dependence on *ex vivo* models that  
240 have been in culture for decades. To determine whether EWSR1 cytoplasmic aggregates were also  
241 present in clinical GBM, we stained a cohort of 15 GBM samples for EWSR1 where 9 of the 15 tumors  
242 were positive for EWSR1 cytoplasmic amyloid-like aggregates (Fig. 5a,b). This establishes a clinically  
243 relevant framework for future studies to determine the functional role of EWSR1 amyloid-like  
244 aggregation in GBM.

245

## Discussion

246 Since the pivotal 2005 clinical trial which changed GBM standard of care to the Stupp regimen - adjuvant  
247 TMZ post-surgery and radiation - TMZ has been almost exclusively used in brain cancers, despite adding  
248 only a few months to median overall survival(R et al., 2005). Given the lack of successful FDA-approved  
249 second-line treatments for GBM, we sought to identify possible dependent pathways that could be  
250 targeted in TMZ-resistant GBM(De Vleeschouwer et al., 2017). However, TMZ is rarely used in other  
251 cancers, and the 400+ clinical trials to-date that have attempted to repurpose chemotherapeutic or  
252 targeted agents from other cancers have failed to provide benefit in GBM(Vanderbeek et al., 2018). We  
253 therefore looked to other central nervous system (CNS) disorders for insight. Mechanistic studies in CNS  
254 disorders, including neurodegenerative diseases (NDs), show pathological disruption of DNA and RNA  
255 secondary structures(Bernat and Disney, 2015), splicing(Mills and Janitz, 2012), and aberrant localization  
256 of RNA binding proteins(Hanson et al., 2012). We therefore reframed our strategy for addressing TMZ-  
257 resistance in the context of nucleotide secondary structure, RNA processing and RNA binding proteins  
258 in TMZ-resistant GBM.

259 As the first anticancer drugs were DNA-targeting, and still play a major role in cancer treatments,  
260 we proposed to determine downstream effects of guanine-focused DNA damage(Balasubramanian et al.,  
261 2011). Guanine is the most readily oxidized base, with the loss of an electron creating a hole that is  
262 preferentially targeted by spontaneous DNA damage, an event whose impact is compounded in tracts of  
263 guanines (Bacolla et al., 2013; Bravaya et al., 2010). The established mechanism of action of TMZ is the  
264 addition of a mutagenic O6-methyl adduct to guanines(Zhang et al., 2012). Guanines are critical  
265 nucleotides that stabilize many essential DNA and RNA secondary structures(McRae et al., 2017) and are  
266 the target of many other chemotherapeutic agents(Cheung-Ong et al., 2013). It also has previously been  
267 shown that TMZ-treated GBM has a characteristic mutational signature of C>T(Alexandrov et al., 2013).  
268 By performing whole genome sequencing (WGS), we found both C>T and G>A mutations to be  
269 enriched. We focused on two key G-rich regions – G-quadruplexes (G4s) and splice sites – to assess  
270 their functional roles in TMZ-resistance. We show sequence- and conformation-based changes in G4s  
271 by WGS and immunofluorescence, respectively, in TMZ-sensitive vs. acute TMZ treated and TMZ-  
272 resistant GBM cells. We also demonstrate that the G4-targeting ligand TMPyP4 is more growth-  
273 inhibitory in TMZ-resistant lines. Previously published studies demonstrate the efficacy of other G4  
274 ligands in multiple cancer cell lines, with CNS-derived models being the most sensitive(Nakamura et al.,  
275 2017). Therapeutic targeting of G4s in ALS can also decrease toxic hexanucleotide repeat foci and  
276 dinucleotide repeat proteins, leading to less disease phenotypes *in vitro*(Simone et al., 2018). Therefore,  
277 this avenue of targeting nucleotide secondary structure changes post-chemotherapy should be

278 investigated further in the future, but will require the development of interventions that can cross the  
279 blood-brain barrier (BBB), as TMPyP4 cannot(Fujiwara et al., 2015).

280 TMZ-resistant GBM cells show an increase in a second critical DNA:RNA secondary structure:  
281 nucleolar R-loops. Nucleoli are major stress organelles whose size and circularity are correlated to cancer  
282 grade(Stamatopoulou et al., 2018). The increase in nucleolar R-loops in TMZ-resistant cells is intriguing,  
283 as a normal DNA-damage response would result in punctated R-loops throughout the nucleus(Gorthi et  
284 al., 2018), which we observe in TMZ-sensitive cells in response to TMZ. However, this pattern is lost in  
285 TMZ-resistant cells. In other settings, nucleolar R-loop increases have been shown to induce genome  
286 instability(Gan et al., 2011), correlate with rDNA mutations, and an aberrant DNA damage  
287 response(Lindström et al., 2018). This further confirms what others have suggested(Cui et al., 2010), that  
288 there may be a differential DNA damage response between TMZ-sensitive and -resistant cells.

289 We further focused on G-rich splice sites and their potential contribution to aberrant regulation  
290 of alternative splicing, a hallmark of many cancers(Gonçalves et al., 2017). We showed that splicing  
291 mutations are enriched in the TMZ-resistant cell lines. We then performed Oxford Nanopore Technology  
292 (ONT) full-length sequencing to more globally assess whether a specific event type was enriched in the  
293 TMZ-resistant cells, and this identified marked enrichment of exon skipping events. The CLK family of  
294 kinases regulates the nuclear hyperphosphorylation of SR proteins, key regulators of exon fate. We  
295 further showed SR proteins to be differentially phosphorylated in TMZ-sensitive versus -resistant cells  
296 following TMZ treatment, found an increase in CLK2 expression in TMZ-resistant cells, and  
297 demonstrated that a novel CLK2 kinase inhibitor is more growth-inhibitory in TMZ-resistant lines.  
298 Targeting splicing broadly is an active area of research with clinical trials underway in *SF3B1* mutant  
299 cancers and neurological diseases(Seiler et al., 2018), and our data suggest that these efforts should be  
300 expanded to TMZ-resistant GBM.

301 Our data further identify EWSR1 as the first, to our knowledge, aggregating RNA-binding  
302 protein in TMZ-resistant GBM. We show that EWSR1 amyloid-like aggregates form in response to acute  
303 TMZ treatment and are abundant in independent models of acquired and intrinsic TMZ resistance.  
304 Preliminary evidence also shows that cytoplasmic EWSR1 aggregates also are present in GBM clinical  
305 samples. This aggregation phenotype is similar to DNA damaged-induced FUS aggregation observed in  
306 FUS-ALS motor neurons(Naumann et al., 2018). RNA buffering may also play a role in the aggregation  
307 phenotype, as we show that inhibition of nucleolar rRNA transcription by acute Actinomycin D (ActD)  
308 treatment can induce ribbon-like strands of EWSR1 around the nucleolus, though the local concentration  
309 of EWSR1 would presumably be increasing as well. The last factor we explored is the ability of DNA  
310 secondary structures to alter protein localization. The inability of EWSR1 to bind the mutated G4s in the

311 TMZ-resistant lines suggest this may affect the normal function and proper regulation of EWSR1 in both  
312 splicing and DNA repair. Overall, our data suggests potential overlapping functions of the cytoplasmic  
313 aggregates of EWSR1 with other neurodegenerative diseases, and further studies may provide insight on  
314 different upstream regulators between DNA damage-induced amyloid-like aggregation in CNS disorders  
315 and possibly other chemotherapy-treated cancers. However, significantly more research needs to be  
316 conducted to determine what part DNA and RNA secondary structures, RNA processing and RNA  
317 binding protein amyloid-like aggregates play in GBM maintenance and TMZ-resistance.  
318

## 319 **Materials and Methods**

### 320 **Cell Lines and Culturing Conditions**

321 Immortalized human oligodendrocyte MO3.13 cells were a kind gift from Dr. Alexandra Taraboletti  
322 (Lombardi Comprehensive Cancer Center, LCCC). Temozolomide (TMZ) sensitive 42MGBA cells  
323 were provided by Dr. Jeffrey Toretsky (LCCC), and the *de novo* TMZ resistant T98G cell line was  
324 provided by Dr. Todd Waldman (LCCC). The acquired TMZ resistant 42MGBA-TMZres cell line  
325 variant was developed by our lab and previously described (Tiek et al., 2018). All cells tested negative for  
326 *Mycoplasma* contamination and were maintained in a humidified incubator with 95% air: 5% carbon  
327 dioxide. All cell lines were fingerprinted by the LCCC Tissue Culture Shared Resource to verify their  
328 authenticity using the standard 9 STR loci and Y-specific amelogenin. The 42MGBA-TMZres cells are  
329 documented to be of the same origin as their parental cell line. MO3.13, 42MGBA, 42MGBA-TMZres,  
330 and T98G cells were grown in Dulbecco's Modified Eagle Medium (DMEM, high glucose,  
331 ThermoFisher, #11965092) with 10% FBS.

332

### 333 **Immunofluorescence**

334 Cells were seeded at a density of 25,000-30,000 cells onto 18mm diameter #1.5 round coverslips (VWR,  
335 #101413-518) in 12-well dishes (day1). They were allowed to attach to the coverslips for a full day  
336 (day2). On the following day (day3), the media was removed, cells were washed 3x with PBS, and then  
337 fixed and permeabilized in 3.2% paraformaldehyde (PFA) with 0.2% Triton X-100 in PBS for 5 minutes  
338 at room temperature. Three washes were performed with PBS in the 12-well plate, then coverslips were  
339 inverted onto 120  $\mu$ L of primary antibody in the antibody block (0.1% gelatin with 10% normal donkey  
340 serum in dH<sub>2</sub>O) on strips of parafilm and incubated for two hours. Coverslips were first incubated with  
341 either BG4 (Sigma MABE1126; 1:150), EWSR1 (Rabbit mAb Abcam ab133288; 1:600; Mouse mAb  
342 SCBT sc-48404; 1:200), S9.6 (Sigma MABE1095; 1:150), or NCL (Novus NBP2-44612-0.02mg; 1:500)  
343 for 2 hours. The donkey serum, non-confluent cells, 2 hour primary, and day 3 staining is *vital* for  
344 visualizing consistent EWSR1 cytoplasmic staining. After incubation with primary antibodies,  
345 coverslips were washed three times with PBS. Then coverslips were inverted onto 100  $\mu$ L of antibody  
346 block with secondary antibodies (Alexa Fluor 488 anti-mouse - 1:200, Life Technologies #A11029;  
347 Alexa Fluor 594 anti-rabbit - 1:200, Life Technologies A11037) and DAPI (DNA, 1:500 dilution) for  
348 20 minutes in the dark. Coverslips were again washed 3x with PBS, then gently dipped four times into  
349 molecular biology-grade water before inversion onto one drop of Fluoro-Gel (with TES Buffer, Electron  
350 Microscopy Sciences, #17985-30) then allowed to air-dry in the dark for at least 10 minutes. Slides were

351 stored at 4°C until image collection on the LCCC Microscopy & Imaging Shared Resource's Leica SP8  
352 microscope with the 63X oil objective at 1.52 magnification.

353

#### 354 **DNase I treatment**

355 Cells were seeded at a density of 25,000-30,000 cells onto 18mm diameter #1.5 round coverslips (VWR,  
356 #101413-518) in 12-well dishes (day1). They were allowed to attach to the coverslips for a full day  
357 (day2). On the following day (day3), the media was removed, cells were washed 3x with PBS, and then  
358 fixed and permeabilized in 3.2% paraformaldehyde (PFA) with 0.2% Triton X-100 in PBS for 3 minutes  
359 at room temperature. 10 µL of a 1000 U of DNase I stock was added to 500 µL of DNase I buffer on  
360 cells for 10 minutes. Cells were washed 3x with PBS and 3.2% PFA with 0.2% Triton X-100 was added  
361 again for 5 minutes post-DNase I treatment. Immunofluorescent staining was completed as stated above.

362

#### 363 **RNase H treatment**

364 Cells were seeded at a density of 25,000-30,000 cells onto 18 mm diameter #1.5 round coverslips (VWR,  
365 #101413-518) in 12-well dishes (day1). They were allowed to attach to the coverslips for a full day  
366 (day2). On the following day (day3), the media was removed, cells were washed 3x with PBS, and then  
367 fixed and permeabilized in 3.2% paraformaldehyde (PFA) with 0.2% Triton X-100 in PBS for 3 minutes  
368 at room temperature. 2 µL of a 5000 U of RNase H stock (NEB M0297S) was added to 500 µL of  
369 RNase H buffer on cells for 5 minutes at 45 °C. Cells were washed 3x with PBS and 3.2% PFA with  
370 0.2% Triton X-100 was added again for 5 minutes post-RNase H treatment. Immunofluorescent staining  
371 was completed as stated above.

372

#### 373 **Evaluation of acrocentric chromosome copy number changes induced by TMZ resistance**

374 As previously published(Tiek et al., 2018), metaphase spreads were prepared using standard protocol(M  
375 et al., 2017). Chromosomes were stained with 4',6'-diamidino-2-phenylindole (DAPI) to determine  
376 total chromosome copy number and acrocentric chromosome copy number in each metaphase. Ratios of  
377 total chromosome number to acrocentric chromosome number in each metaphase were calculated and  
378 graphed in R.

379

#### 380 **NanoBRET measurements for GW807982X (CLK2i)**

381 CLK1, 2, and 4 NanoBRET assays were performed as previously described(Robers et al., 2015; Vasta et  
382 al., 2018). In brief the N-terminal Nano Luciferase/CLK1 fusion (NL-CLK1) or C-terminal Nano  
383 Luciferase/CLK2 fusion (CLK2-NL) or C-terminal Nano Luciferase/CLK4 fusion (CLK4-NL) was

384 encoded in pFN31K expression vector, including flexible Gly-Ser-Ser-Gly linkers between NL and  
385 CLK1,2 or 4 (Promega Madison, WI, USA) (Stoddart et al., 2015). For cellular NanoBRET Target  
386 Engagement experiments, the NL-CLK1 or CLK2-NL or CLK4-NL fusion construct was diluted with  
387 carrier DNA - pGEM-3Zf(-) (Promega, Madison, WI, USA) at a mass ratio of 1:10 (mass/mass), prior  
388 to adding FuGENE HD (Promega, Madison, WI, USA). DNA:FuGENE complexes were formed at a  
389 ratio of 1:3 ( $\mu\text{g DNA}/\mu\text{L FuGENE HD}$ ) according to the manufacturer's protocol (Promega, Madison,  
390 WI, USA). The resulting transfection complex (1 part, volume) was then gently mixed with 20 parts  
391 (v/v) of HEK-293 cells (ATCC) suspended at a density of  $2 \times 10^5$  cells/mL in DMEM (Gibco) + 10%  
392 FBS (Seradigm/VWR). 100  $\mu\text{L}$  of this solution was added to each well of a 96-well plate (Corning 3917)  
393 followed by incubation ( $37^\circ\text{C}/5\% \text{CO}_2$ ) for 24 hours. After 24 hours the media was removed from the  
394 HEK293 CLK (NL-CLK1, CLK2-NL or CLK4-NL) transfected cells and replaced with 85  $\mu\text{L}$  OPTI-  
395 MEM media (Gibco). NanoBRET Tracer 5 (Promega, Madison, WI, USA) was used at a final  
396 concentration of 1.0  $\mu\text{M}$  as previously evaluated in a titration experiment. A total of 5  $\mu\text{L}/\text{well}$  (20x  
397 working stock of nanoBRET Tracer 5 [20  $\mu\text{M}$ ]) was added to all wells, except the “no tracer” control  
398 wells to which 5  $\mu\text{L}/\text{well}$  of tracer dilution buffer alone was added. All inhibitors were prepared initially  
399 as concentrated stock solutions in 100% DMSO (Sigma). A total of 10  $\mu\text{L}/\text{well}$  of the 10x chemical  
400 inhibitor stock solutions (final assay concentration 1 % DMSO) were added. For “no compound” and  
401 “no tracer” control wells, a total of 10  $\mu\text{L}/\text{well}$  of Opti-MEM plus DMSO (9  $\mu\text{L}$  was added (final  
402 concentration 1 % DMSO)). 96 well plates containing cells with NanoBRET Tracer 5 and inhibitors  
403 (100  $\mu\text{L}$  total volume per well) were equilibrated ( $37^\circ\text{C}/5\% \text{CO}_2$ ) for 2 hours. To measure NanoBRET  
404 signal, NanoBRET NanoGlo substrate at a ratio of 1:166 to Opti-MEM media in combination with  
405 extracellular NanoLuc Inhibitor diluted 1:500 (10  $\mu\text{L}$  [30 mM stock] per 5 mL Opti-MEM plus substrate)  
406 were combined to create a 3x stock. A total of 50  $\mu\text{L}$  of the 3x substrate/extracellular NanoLuc inhibitor  
407 were added to each well. The plates were read within 15 minutes (GloMax Discover luminometer,  
408 Promega, Madison, WI, USA) equipped with 450 nM BP filter (donor) and 600 nM LP filter (acceptor),  
409 using 0.3 s integration time instrument utilizing the “nanoBRET 618” protocol. Eleven concentrations  
410 of GW807982X were evaluated in competition with NanoBRET Tracer 5 in HEK293 cells transiently  
411 expressing CLK1, 2, and 4. Prior to curve fitting the values are converted to mBRET units ( $\times 1000$ ).  
412 Additional normalization of the NanoBRET assay data was performed by converting experimental  
413 values for respective concentrations of experimental inhibitors to relative percent control values (no  
414 compound [Opti-MEM + DMSO + Tracer 5 only] wells = 100 % Control, no tracer [Opti-MEM +  
415 DMSO] wells = 0 % Control). The data was normalized to 0 % and 100 % inhibition control values and

416 fitted to a four parameter dose-response binding curve in GraphPad Software (version 7, La Jolla, CA,  
417 USA).

418

#### 419 **Cell cycle analysis**

420 For TMPyP4 treatment, on day 0 cells were seeded at 100,000 cells per well in 6-well plastic tissue  
421 culture dishes one day prior to treatment with the indicated concentrations of drug. 50  $\mu$ M TMPyP4 was  
422 added on day1, treatment time was 48 hours. After 48 hours, cells were collected, washed with PBS,  
423 ethanol-fixed, stained with propidium iodide, and analyzed for cell subG1 (fragmented/apoptotic) DNA  
424 content and cell cycle profile. 20,000 cells were acquired by flow cytometry on a Becton Dickinson  
425 Fortessa. Files were modeled using ModFit software (Verity Software, Topsham, ME) to determine  
426 subG1, G1, S, and G2/M cell cycle stage. For CLK2i treatment, on day 0 cells were seeded at 200,000  
427 cells per well in 6-well plastic tissue culture dishes one day prior to treatment with the indicated  
428 concentrations of drug. 5  $\mu$ M CLK2i was added on day1, treatment time was 24 hours. After 24 hours,  
429 cells were collected, washed with PBS, ethanol-fixed, stained with propidium iodide, and analyzed for  
430 cell subG1 (fragmented/apoptotic) DNA content, cell cycle profile, and growth rate. 20,000 cells were  
431 acquired by flow cytometry on a Becton Dickinson Fortessa. Files were modeled using ModFit software  
432 (Verity Software, Topsham, ME) to determine subG1, G1, S, and G2/M cell cycle stage.

433

#### 434 **Nucleolar size and circularity detection and graphing**

435 Images taken from the Leica SP8 microscope were opened in FIJI, split into the channel to be analyzed,  
436 and converted from RGB to 8-bit images for analysis. In FIJI, the intensity threshold was set via Image  
437 -> Adjust -> Threshold (over/under 95). Next, the image was made into a binary form (Process -> Binary  
438 -> Make binary). Finally, particles that met the threshold were quantified for area and circularity via  
439 Analyze -> Analyze particles. These readouts were then imported into R and graphed/analyzed using the  
440 R markdown file "Raincloud\_Area" in the supplemental files.

441

#### 442 **Western blot analysis**

443 Cells were lysed in RIPA buffer supplemented with protease and phosphatase inhibitors (Roche,  
444 #4906837001) for protein extractions and separated by polyacrylamide gel electrophoresis using 4-12%  
445 gradient gels (Novex by Life Tech, #NP0321BOX) as described previously (19). They were then  
446 transferred onto Nitrocellulose membranes (Invitrogen, #IB23001) with the iBlot2 (Invitrogen,  
447 #IB21001) and probed with the following antibodies: EWSR1 (1:1000, abcam, ab133288), CLK2  
448 (1:1000, sigma, HPA055366-100UL), phosphorylated SR proteins (clone 1H4, 1:500, Millipore,



449 #MABE50. Beta-Tubulin (1:5000, Sigma Aldrich, #T7816) and Beta-Actin (1:5000, Sigma-Aldrich,  
450 #A5316) were used as loading controls. Proteins were detected with horseradish peroxidase-conjugated  
451 secondary antibodies (1:5000, GE Healthcare Life Sciences, #NA931-1ML (Mouse) or #NA934-1ML  
452 (Rabbit)) and enhanced chemiluminescent detection HyGLO Quick Spray Chemiluminescent (Denville  
453 Scientific, #E2400) using film (Denville Scientific, #E3212).

454

#### 455 **High resolution stimulated emission depletion microscopy (STED)**

456 STED images were acquired using a Leica SP8 3X STED microscope, a white-light laser for  
457 fluorescence excitation (470-670 nm), time-gated hybrid-PMTs, and a Leica 100x (1.4 N.A.) STED  
458 White objective (Leica Microsystems, Inc.). AF594 was excited with 575nm excitation, with a back  
459 projected pinhole at 200 nm, and the fluorescence emission was collected at 610 nm with a Line average  
460 or 4, Frame accumulation of 2, and Line accumulation of 1. Time-gating of the emission signal from the  
461 PMT was set to a range of 0.7-6.5 ns for experiments involving the 775 nm depletion laser. Z-stacks  
462 were taken X= 24.890 nm, Y=24.890 nm, and Z=160.217 nm. The pinhole was set to a value of 0.7 airy  
463 units for all images. Image deconvolution was performed using Hyugens software (Scientific Volume  
464 Imaging B.V., Netherlands) assuming an idealized STED point spread function.

465

#### 466 **siRNA knockdown of EWSR1**

467 Dharmacon individual set of 4 2 nmol EWSR1 siRNAs were purchased (LQ-005119-02-0002) and  
468 resuspended in RNA reconstitution buffer provided. On day 0, 250  $\mu$ L of Opti-MEM was warmed and  
469 added to 5  $\mu$ L of siRNA (stock = 20  $\mu$ M) and 7.5  $\mu$ L of Trans-IT X2. The mixture was left to form  
470 micelles for 25 minutes. This was then added dropwise to 6-wells with 1% FBS media and 100,000  
471 freshly plated cells. The cells then adhered overnight, and media was changed the following morning.  
472 Cells were collected 48 hours later for either cell cycle analysis or Western blot, which allowed for 72  
473 hours of transfection total.

474

#### 475 **Immunohistochemistry on human GBM patient samples**

476 Immunohistochemical staining of GBM was performed for EWSR1. Five-micron sections from formalin  
477 fixed paraffin embedded tissues were de-paraffinized with xylenes and rehydrated through a graded  
478 alcohol series. Heat induced epitope retrieval (HIER) was performed by immersing the tissue sections at  
479 98 °C for 20 minutes in 10 mM citrate buffer (pH 6.0) with 0.05% Tween. Immunohistochemical staining  
480 was performed using a horseradish peroxidase labeled polymer from Agilent (K4003) according to  
481 manufacturer's instructions. Briefly, slides were treated with 3% hydrogen peroxide and 10% normal

482 goat serum for 10 minutes each and exposed to primary antibodies for EWSR1 (1/400, Abcam,  
483 ab133288) overnight at 4 °C. Slides were exposed to the appropriate HRP labeled polymer for 30 min  
484 and DAB chromagen (Dako) for 5 minutes. Slides were counterstained with Hematoxylin (Fisher, Harris  
485 Modified Hematoxylin), blued in 1% ammonium hydroxide, dehydrated, and mounted with Acrymount.  
486 Consecutive sections with the primary antibody omitted were used as negative controls.

487

#### 488 **RNA isolation**

489 750,000 cells were seeded on day 0. The following day cells were washed 3x with PBS, trypsinized, and  
490 pelleted into an Eppendorf tube. Then, 4 mL of TRIzol was added to each tube and incubated at room  
491 temperature for 5 minutes. 1 mL of each sample was aliquoted into 4 separate tubes. 200 µL of  
492 chloroform was added to each tube and vortexed briefly to mix. Samples incubated at room temperature  
493 for 5 minutes, were briefly vortexed, and then centrifuged at 12,000g for 10 min at 4 °C. 500 µL of the  
494 clear upper layer was collected from each tube and pooled into two 1 mL Eppendorf tubes where 500  
495 µL of isopropanol was added and mixed thoroughly by multiple inversions. Samples were incubated for  
496 15 minutes at room temperature, and then centrifuged for 15 minutes at 12,000 g at 4 °C. Supernatant  
497 was then discarded, and pellet was washed with 750 µL 80% ethanol by multiple inversions. Sample  
498 was centrifuged for 5 minutes at 4 °C at 12,000 g. Pellet was again washed with 80% ethanol by multiple  
499 inversions and centrifuged the same way as before. The supernatant was removed and discarded, and a  
500 second quick spin was done to remove any residual contaminating liquid. The RNA pellet was then air  
501 dried for 10 minutes before being resuspended in 100 µL of nuclease-free water. Total RNA was  
502 quantified using a NanoDrop 2000.

503

#### 504 **Nanopore sequencing**

505 20 µg aliquots of total RNA were diluted in 100 µl of nuclease free water and poly-A selected using  
506 NEXTflex Poly(A) Beads (BIOO Scientific Cat#NOVA-512980). Resulting poly-A RNA was  
507 quantified and 50 ng aliquots were transferred to thin walled Eppendorf PCR tubes. The biological poly-  
508 A RNA and a synthetic control (Lexogen SIRV Set 3, 0.5 ng) were prepared for cDNA synthesis and  
509 nanopore sequencing following the ONT SQK-PCS108 kit protocol with a few exceptions. During the  
510 reverse transcription step, Superscript IV was used and the reverse transcription incubation time was  
511 increased to 15 minutes. After reverse transcription, PCR was performed using LongAmp Taq Master  
512 Mix (NEB) under the following conditions: 95°C for 30 seconds, 10 cycles (95°C for 15 seconds, 62°C  
513 for 15 seconds, 65°C for 15 minutes), 65°C for 15 minutes, hold at 4°C. The resulting cDNA libraries  
514 were quantified and sequencing libraries were prepared using 700 ng of cDNA following the standard

515 protocol for SQK-PCS108 (1D sequencing). Sequencing was performed on the GridION platform using  
516 ONT R9.4 flow cells and the standard MinKNOW protocol script (NC\_48hr\_sequencing\_FLO-  
517 MIN106\_SCK-PCS108).

### 518 **Nanopore full-length sequencing analysis**

519 Albacore workflow (version 2.1.3) was used for basecalling cDNA data. Using minimap2(Li, 2018) with  
520 recommended parameters (-ax splice -uf -k14), reads were aligned to the GRCh38 human genome  
521 reference<sup>2</sup> in order to investigate possible novel isoforms. To define isoforms from the sets of cDNA  
522 reads, we used FLAIR (v1.3)(Tang et al.). Using FLAIR-correct, we corrected the aligned reads  
523 providing splice site evidence from Gencode v29(Frankish et al., 2019) annotations. The corrected and  
524 filtered reads were then given to FLAIR-collapse to produce a nanopore-specific reference containing  
525 high-confidence isoforms with at least 3 supporting reads. FLAIR-quantify was then used to quantify  
526 FLAIR isoform usage across different samples. SUPPA2(Trincado et al., 2018), a differential splicing  
527 analysis tool was used to investigate different local alternative splicing event types across samples. Files  
528 and codes associated with this analysis can be found at [https://github.com/timplab/Drug\\_resistant\\_GBM](https://github.com/timplab/Drug_resistant_GBM).

529

### 530 **DNA isolation for Whole genome sequencing**

531 750,000 cells were collected for each cell line, where DNA was isolated using the DNeasy Blood and  
532 Tissue Kit (Qiagen; Cat. No. 69504). Briefly, cells were centrifuged and resuspended with proteinase K  
533 and buffer AL for 10 min at 56 °C. 200 µL of ethanol was then added and mixed thoroughly by vortexing.  
534 DNA was added to the DNeasy Mini spin column, centrifuged, and flow-through discarded. DNA was  
535 washed in the DNeasy column with buffer AW1 once, and AW2 once as well. Membrane was then dried  
536 by centrifugation with all flow-through being discarded. DNA was eluted using 200 µL buffer AE after  
537 1 min incubation at room temperature.

538

### 539 **Whole genome sequencing using Illumina TruSeq DNA PCR-Free Library prep Kit**

540 Illumina TruSeq DNA PCR-Free Library prep Kit was used per manufactures instructions. Paired-end,  
541 indexed libraries for human whole genome sequencing were constructed from 1.0 µg gDNA using the  
542 TruSeq DNA PCR-Free Library Prep Kit (Illumina, San Diego) according to manufacturer's  
543 instructions. Briefly, DNA was fragmented using a Covaris M220 focused ultrasonicator (Covaris,  
544 Woburn, MA) using settings for a 350 bp insert size. Library quality was assessed with a BioAnalyzer  
545 2100 using the High Sensitivity DNA kit (Agilent Technologies, Santa Clara, CA). The libraries were  
546 quantified using the Kapa Library Quantification Kit Illumina Platforms (Kapa Biosystems, Boston,

547 MA). The denatured and diluted libraries were sequenced on a NextSeq 550 System (Illumina) using  
548 v2.5 High Output 300 cycle kit with 1% PhiX to an average sequencing depth of 50X coverage.

549

550

### 551 **Whole genome sequencing analysis**

552 Raw data were first demultiplexed into 3 groups, which were 42MBGA-WT, 42MGBA-TMZres and  
553 T98G, each group had two biological duplicates. All raw sequence data (fastq files) were run through  
554 fastQC v0.11.7 for quality check, lower quality reads ( $Q < 20$ ) were eliminated. Cutadapt v2.1 was used  
555 for adapter trimming, read length less than 20 bp after trimming were filtered. Processed reads were then  
556 aligned to GRCh38 reference sequence using bwa v0.7.17 paired-end mode(Li and Durbin, 2009).  
557 Mutation detection was conducted in GATK v4.1.0.0(McKenna et al., 2010) following the best practice  
558 for variant calling workflow(DePristo et al., 2011). The consensus assembly for each sample were  
559 created by bcftools, then the Quadron methodology(Sahakyan et al., 2017) was used to detect stable G4  
560 structures. Unique G-Quad sequence with  $Q > 19$  were extracted from each group for further analysis

561

### 562 **Data availability**

563 The whole genome DNA sequencing and Nanopore full-length RNA sequencing raw data generated and  
564 analysed in the current study are available from the corresponding authors upon request, and will be  
565 deposited to the NCBI Sequence Read Archive prior to publication.

566

567

568

569

570

571

572

573

574

575

576

577

578

579

## 580 **Figure Legends**

581 **Figure 1. Guanine mutations in TMZ-resistant GBM cells disrupt G-quadruplex (G4) structure**  
582 **and associate with sensitivity to the G4 stabilizing drug TMPyP4.** a. Single nucleotide changes  
583 identified by whole genome sequencing data aligned to GRCh38 and analyzed by Genome Analysis  
584 Toolkit (GATK) mutation calling; duplicate samples with 2-way ANOVA for total mutation count. b.  
585 Enrichment of G>A and C>T transition mutations in TMZ-resistant cells; duplicate samples with 2-way  
586 ANOVA. c. MEME-predicted enriched motifs from Quadron-derived unique acrocentric chromosome  
587 sequences between 42MBGA(E-value top; 1.4e-231, bottom; 9.4e-013), 42MBGA-TMZres (E-value  
588 7.9e-206), and T98G (E-value top; 9.3e-198, bottom; 7.2e-013) cell lines. d-g. Immunofluorescent  
589 staining with the G-quadruplex antibody BG4 in d. TMZ-sensitive 42MBGA, e. 72 hr-treated 42MBGA,  
590 and TMZ-resistant f. 42MBGA-TMZres, and g. T98G cells with surface plots of signal intensity below  
591 generated by FIJI. Yellow outline denotes nuclear BG4 staining and the region analyzed in FIJI;  
592 representative of three biological replicates. h. Graphical depiction of the hypothesis that TMZ-induced  
593 O<sup>6</sup>-methylguanine (O<sup>6</sup>meG) adducts and subsequent mutations disrupt G4s. i-k. FACS analysis  
594 following 24 hours of treatment with 50  $\mu$ M TMPyP4 or DMSO vehicle control in 42MBGA, 42MBGA-  
595 TMZres, and T98G cells; three biological replicates. i. Growth rates; t-test. j. Percent of cells in G2/M;  
596 t-test. k. Percent of cells with subG1 DNA content; t-test \* p<0.05, \*\* p<0.001 \*\*\* p<0.0005, \*\*\*\*  
597 p<0.0001.

598  
599 **Figure 2. TMZ treatment and resistance associate with increased nucleolar stress and the**  
600 **formation of nucleolar R-loops.** a. Analysis of acrocentric chromosome fraction between 42MBGA  
601 and 42MBGA-TMZres from total chromosome metaphase spreads. b. Representative images of  
602 endogenous nucleolin (NCL) immunofluorescence (IF). c. Quantification of nucleolar area from images  
603 in b. d. Quantification of nucleolar circularity from images in b. IF with the R-loop binding S9.6 antibody  
604 in e. 42MBGA, f. 72 hr TMZ treatment in 42MGBA, g. 42MBGA-TMZres, h. T98G. i. Quantification  
605 of R-loop intensity in e, g and h. \*\* p<0.005, \*\*\*\*\* p<0.0001.

606  
607 **Figure 3. Splice-site mutations in TMZ-resistant GBM cells associate with increased exon skipping**  
608 **and sensitivity to a novel CLK inhibitor (GW807982X, CLK2i).** a. Quantification of splice-site  
609 mutations in TMZ-sensitive vs. -resistant cells from whole genome sequencing analyses described in  
610 Figure 1; One-way ANOVA. b. FLAIR and SUPPA2 analysis of Oxford Nanopore Technology full-  
611 length transcript sequencing for differences in alternative splicing by event type in TMZ-sensitive  
612 42MGBA and TMZ-resistant 42MGBA-TMZres and T98G cells. c. Quantified IF of pSR (1H4) intensity

613 in cells with (yH2AX+) or without (yH2AX-) DNA damage; two-tailed t-test. d. Association between  
614 CLK2 mRNA expression and overall survival in the REMBRANDT brain cancer data set; log-rank  
615 (Mantel-Cox) test. e. Association between CLK2 expression and increasing brain tumor grade and  
616 aggressiveness in the REMBRANDT dataset; one-way ANOVA. f. Western blot of CLK2 expression in  
617 TMZ-sensitive, -treated, and -resistant GBM cell lines. g. FACS analysis for cell cycle profile in  
618 response to 5  $\mu$ M CLK2i vs. DMSO vehicle control treatment for 24 hours; three biological replicates  
619 with One-way ANOVA. h. Relative cell numbers following 24 hr treatment with 5  $\mu$ M CLK2i vs DMSO  
620 vehicle control; three biological replicates with t-test, i. SubG1 or apoptotic DNA content in cells  
621 analyzed in g; three biological replicates with t-test. \*  $p < 0.05$ , \*\* $p < 0.001$ , \*\*\* $p < 0.0005$ , \*\*\*\* $p < 0.0001$ .  
622

623 **Figure 4. The RNA binding protein EWSR1 forms cytoplasmic, amyloid-like aggregates in TMZ-**  
624 **treated and TMZ-resistant GBM cells.** a. Basal IF of EWSR1 in the indicated cell lines, with the  
625 nucleus outlined in yellow. High-resolution stimulated emission depletion microscopy (STED) imaging  
626 of EWSR1 cytoplasmic aggregates in b. 42MBGA-TMZres and c. T98G cells. d. Western blot of  
627 EWSR1 total protein expression in the indicates cell lines. e. Localization of EWSR1 to nucleoli adjacent  
628 to R-loops (S9.6) following 3 hr 10nM Actinomycin D (ActD) treatment to inhibit RNAPI. STED  
629 imaging of EWSR1 nucleolar movement following 3 hr ActD treatment in f. 42MBGA, g. 42MBGA-  
630 TMZres, h. T98G cells.

631

632 **Figure 5. Cytoplasmic EWSR1 aggregates are detected in GBM clinical specimens.** a.  
633 Characteristics of GBM patients with outer circle denoting age, middle circle denoting sex, and inner  
634 circle denoting EWSR1 aggregate status. b. IHC of EWSR1 in 6 GBM patient samples. Red box denotes  
635 higher magnification inset showing cells with cytoplasmic aggregates of EWSR1.

636

637

638

684 **Financial Support:** This work was supported by a Georgetown University Medical Center (GUMC)  
685 Dean for Research's Toulmin Pilot Project Award (RBR), and a Partners in Research Breakthrough  
686 Award (RBR), as well as F99 CA234799 (DMT) and a student research grant from the Medical Center  
687 Graduate Student Organization (MCGSO, to DMT). Additional fellowship funding for DMT was  
688 provided by the Tumor Biology Training Grant (T32 CA009686, PI: Dr. Anna T. Riegel). Technical  
689 services were provided by the GUMC, Flow Cytometry & Cell Sorting, Histopathology & Tissue,  
690 Microscopy & Imaging, and Tissue Culture Shared Resources, which are supported in part by Cancer  
691 Center Support Grant P30 CA051008 (PI: Dr. Louis M. Weiner). The content of this article is the sole  
692 responsibility of the authors and does not represent the official views of the National Institutes of Health.

693

694 **Conflict of Interest and Author Contribution Statement:** The authors declare no potential conflict of  
695 interest. DMT contributed to study design, performed experiments, analyzed data, and wrote the paper.  
696 RR analyzed data. NS performed experiments. LJ analyzed data. CAF performed experiments. JRH  
697 provided reagents and input on the paper. BRH performed experiments and input on the paper. DHD  
698 provided reagents and input on the paper. CIW performed experiments. JEP performed experiments.  
699 WJZ contributed to study design, provided reagents, and input on the paper. WT contributed to study  
700 design, provided reagents, and input on the paper. RBR contributed to study design, analyzed data, and  
701 wrote the paper. All authors reviewed, edited, and approved the manuscript.

702

### 703 **Acknowledgements**

704 We wish to thank Drs. Deborah Berry, Angela Brooks, Christian Combs, Karen Creswell, Brent Harris,  
705 Rong Hu, Peter Johnson, Moshe Levi, Supti Sen, Alexandra Taraboletti, Jeffrey Toretsky, Todd  
706 Waldman, Cameron Soulette, Jay Patel and Dan Xun for sharing reagents, scientific insights, technical  
707 assistance, and/or editorial comments on the manuscript.

708

709

710

711

712

713

714

715

716

717

## 718 **References**

719

720 Agarwal, S., Kern, S., Halbert, J., Przyborski, J.M., Baumeister, S., Dandekar, T., Doerig, C., and  
721 Pradel, G. (2011). Two nucleus-localized CDK-like kinases with crucial roles for malaria parasite  
722 erythrocytic replication are involved in phosphorylation of splicing factor. *J. Cell. Biochem.* *112*,  
723 1295–1310.

724 Alexandrov, L.B., Nik-Zainal, S., Wedge, D.C., Aparicio, S.A.J.R., Behjati, S., Biankin, A.V., Bignell,  
725 G.R., Bolli, N., Borg, A., Børresen-Dale, A.-L., et al. (2013). Signatures of mutational processes in  
726 human cancer. *Nature* *500*, 415–421.

727 Bacolla, A., Temiz, N.A., Yi, M., Ivanic, J., Cer, R.Z., Donohue, D.E., Ball, E.V., Mudunuri, U.S.,  
728 Wang, G., Jain, A., et al. (2013). Guanine holes are prominent targets for mutation in cancer and  
729 inherited disease. *PLoS Genet.* *9*, e1003816.

730 Bailey, T.L., and Elkan, C. (1994). Fitting a mixture model by expectation maximization to discover  
731 motifs in biopolymers. *Proc Int Conf Intell Syst Mol Biol* *2*, 28–36.

732 Balasubramanian, S., Hurley, L.H., and Neidle, S. (2011). Targeting G-quadruplexes in gene  
733 promoters: a novel anticancer strategy? *Nat Rev Drug Discov* *10*, 261–275.

734 Bejar, R. (2016). Splicing Factor Mutations in Cancer. *Adv. Exp. Med. Biol.* *907*, 215–228.

735 Bernat, V., and Disney, M.D. (2015). RNA Structures as Mediators of Neurological Diseases and as  
736 Drug Targets. *Neuron* *87*, 28–46.

737 Biffi, G., Tannahill, D., McCafferty, J., and Balasubramanian, S. (2013). Quantitative visualization of  
738 DNA G-quadruplex structures in human cells. *Nat Chem* *5*, 182–186.

739 Braun, C.J., Stanciu, M., Boutz, P.L., Patterson, J.C., Calligaris, D., Higuchi, F., Neupane, R.,  
740 Fenoglio, S., Cahill, D.P., Wakimoto, H., et al. (2017). Coordinated Splicing of Regulatory Detained  
741 Introns within Oncogenic Transcripts Creates an Exploitable Vulnerability in Malignant Glioma.  
742 *Cancer Cell* *32*, 411–426.e411.

743 Bravaya, K.B., Kostko, O., Dolgikh, S., Landau, A., Ahmed, M., and Krylov, A.I. (2010). Electronic  
744 structure and spectroscopy of nucleic acid bases: ionization energies, ionization-induced structural  
745 changes, and photoelectron spectra. *J Phys Chem A* *114*, 12305–12317.

746 Cheung-Ong, K., Giaever, G., and Nislow, C. (2013). DNA-damaging agents in cancer chemotherapy:  
747 serendipity and chemical biology. *Chem. Biol.* *20*, 648–659.

748 Cogoi, S., and Xodo, L.E. (2006). G-quadruplex formation within the promoter of the KRAS proto-  
749 oncogene and its effect on transcription. *Nucleic Acids Res.* *34*, 2536–2549.

750 Cui, B., Johnson, S.P., Bullock, N., Ali-Osman, F., Bigner, D.D., and Friedman, H.S. (2010).  
751 Decoupling of DNA damage response signaling from DNA damages underlies temozolomide  
752 resistance in glioblastoma cells. *J Biomed Res* *24*, 424–435.

753 De Vleeschouwer, S., Fernandes, C., Costa, A., Osório, L., Lago, R.C., Linhares, P., Carvalho, B., and  
754 Caeiro, C. (2017). Current Standards of Care in Glioblastoma Therapy. *Glioblastoma* 197–241.



- 755 DePristo, M.A., Banks, E., Poplin, R., Garimella, K.V., Maguire, J.R., Hartl, C., Philippakis, A.A., del  
756 Angel, G., Rivas, M.A., Hanna, M., et al. (2011). A framework for variation discovery and genotyping  
757 using next-generation DNA sequencing data. *Nat. Genet.* *43*, 491–498.
- 758 Drewry, D.H., Willson, T.M., and Zuercher, W.J. (2014). Seeding collaborations to advance kinase  
759 science with the GSK Published Kinase Inhibitor Set (PKIS). *Curr Top Med Chem* *14*, 340–342.
- 760 Elkins, J.M., Fedele, V., Szklarz, M., Abdul Azeez, K.R., Salah, E., Mikolajczyk, J., Romanov, S.,  
761 Sepetov, N., Huang, X.-P., Roth, B.L., et al. (2016). Comprehensive characterization of the Published  
762 Kinase Inhibitor Set. *Nat. Biotechnol.* *34*, 95–103.
- 763 Fernando, H., Reszka, A.P., Huppert, J., Ladame, S., Rankin, S., Venkitaraman, A.R., Neidle, S., and  
764 Balasubramanian, S. (2006). A conserved quadruplex motif located in a transcription activation site of  
765 the human c-kit oncogene. *Biochemistry* *45*, 7854–7860.
- 766 Frankish, A., Diekhans, M., Ferreira, A.-M., Johnson, R., Jungreis, I., Loveland, J., Mudge, J.M., Sisu,  
767 C., Wright, J., Armstrong, J., et al. (2019). GENCODE reference annotation for the human and mouse  
768 genomes. *Nucleic Acids Res.* *47*, D766–D773.
- 769 Fujiwara, N., Mazzola, M., Cai, E., Wang, M., and Cave, J.W. (2015). TMPyP4, a Stabilizer of  
770 Nucleic Acid Secondary Structure, Is a Novel Acetylcholinesterase Inhibitor. *PLoS ONE* *10*,  
771 e0139167.
- 772 Gan, W., Guan, Z., Liu, J., Gui, T., Shen, K., Manley, J.L., and Li, X. (2011). R-loop-mediated  
773 genomic instability is caused by impairment of replication fork progression. *Genes Dev.* *25*, 2041–  
774 2056.
- 775 Gonçalves, V., Pereira, J.F.S., and Jordan, P. (2017). Signaling Pathways Driving Aberrant Splicing in  
776 Cancer Cells. *Genes (Basel)* *9*, 9.
- 777 Gorthi, A., Romero, J.C., Loranc, E., Cao, L., Lawrence, L.A., Goodale, E., Iniguez, A.B., Bernard, X.,  
778 Masamsetti, V.P., Roston, S., et al. (2018). EWS-FLI1 increases transcription to cause R-loops and  
779 block BRCA1 repair in Ewing sarcoma. *Nature* *555*, 387–391.
- 780 Grünewald, T.G.P., Bernard, V., Gilardi-Hebenstreit, P., Raynal, V., Surdez, D., Aynaud, M.-M.,  
781 Mirabeau, O., Cidre-Aranaz, F., Tirode, F., Zaidi, S., et al. (2015). Chimeric EWSR1-FLI1 regulates  
782 the Ewing sarcoma susceptibility gene EGR2 via a GGAA microsatellite. *Nat. Genet.* *47*, 1073–1078.
- 783 Haeusler, A.R., Donnelly, C.J., Periz, G., Simko, E.A.J., Shaw, P.G., Kim, M.-S., Maragakis, N.J.,  
784 Troncoso, J.C., Pandey, A., Sattler, R., et al. (2014). C9orf72 nucleotide repeat structures initiate  
785 molecular cascades of disease. *Nature* *507*, 195–200.
- 786 Hanson, K.A., Kim, S.H., and Tibbetts, R.S. (2012). RNA-binding proteins in neurodegenerative  
787 disease: TDP-43 and beyond. *Wiley Interdiscip Rev RNA* *3*, 265–285.
- 788 Harrison, A.F., and Shorter, J. (2017). RNA-binding proteins with prion-like domains in health and  
789 disease. *Biochem. J.* *474*, 1417–1438.
- 790 Hänsel-Hertsch, R., Di Antonio, M., and Balasubramanian, S. (2017). DNA G-quadruplexes in the  
791 human genome: detection, functions and therapeutic potential. *Nat. Rev. Mol. Cell Biol.* *18*, 279–284.

- 792 Izhar, L., Adamson, B., Ciccia, A., Lewis, J., Pontano-Vaites, L., Leng, Y., Liang, A.C., Westbrook,  
793 T.F., Harper, J.W., and Elledge, S.J. (2015). A Systematic Analysis of Factors Localized to Damaged  
794 Chromatin Reveals PARP-Dependent Recruitment of Transcription Factors. *Cell Rep* *11*, 1486–1500.
- 795 König, F., Schubert, T., and Längst, G. (2017). The monoclonal S9.6 antibody exhibits highly variable  
796 binding affinities towards different R-loop sequences. *PLoS ONE* *12*, e0178875.
- 797 Li, H. (2018). Minimap2: pairwise alignment for nucleotide sequences. *Bioinformatics* *34*, 3094–3100.
- 798 Li, H., and Durbin, R. (2009). Fast and accurate short read alignment with Burrows–Wheeler  
799 transform. *Bioinformatics* *25*, 1754–1760.
- 800 Lindström, M.S., Jurada, D., Bursac, S., Orsolich, I., Bartek, J., and Volarevic, S. (2018). Nucleolus as  
801 an emerging hub in maintenance of genome stability and cancer pathogenesis. *Oncogene* *37*, 2351–  
802 2366.
- 803 Luo, Y., Blechingberg, J., Fernandes, A.M., Li, S., Fryland, T., Børghlum, A.D., Bolund, L., and  
804 Nielsen, A.L. (2015). EWS and FUS bind a subset of transcribed genes encoding proteins enriched in  
805 RNA regulatory functions. *BMC Genomics* *16*, 929.
- 806 M, A., H, L., and M, B. (2017). The AGT cytogenetics laboratory manual, 4th edition. Wiley-  
807 Blackwell.
- 808 Maharana, S., Wang, J., Papadopoulos, D.K., Richter, D., Pozniakovsky, A., Poser, I., Bickle, M.,  
809 Rizk, S., Guillén-Boixet, J., Franzmann, T.M., et al. (2018). RNA buffers the phase separation  
810 behavior of prion-like RNA binding proteins. *Science* *360*, 918–921.
- 811 Mannas, J.P., Lightner, D.D., Defrates, S.R., Pittman, T., and Villano, J.L. (2014). Long-term  
812 treatment with temozolomide in malignant glioma. *J Clin Neurosci* *21*, 121–123.
- 813 Marsoner, T., Schmidt, O.P., Triemer, T., and Luedtke, N.W. (2017). DNA-Targeted Inhibition of  
814 MGMT. *Chembiochem* *18*, 894–898.
- 815 McKenna, A., Hanna, M., Banks, E., Sivachenko, A., Cibulskis, K., Kernytsky, A., Garimella, K.,  
816 Altshuler, D., Gabriel, S., Daly, M., et al. (2010). The Genome Analysis Toolkit: a MapReduce  
817 framework for analyzing next-generation DNA sequencing data. *Genome Res.* *20*, 1297–1303.
- 818 McRae, E.K.S., Booy, E.P., Padilla-Meier, G.P., and McKenna, S.A. (2017). On Characterizing the  
819 Interactions between Proteins and Guanine Quadruplex Structures of Nucleic Acids. *J Nucleic Acids*  
820 *2017*, 9675348–11.
- 821 Membrino, A., Cogoi, S., Pedersen, E.B., and Xodo, L.E. (2011). G4-DNA formation in the HRAS  
822 promoter and rational design of decoy oligonucleotides for cancer therapy. *PLoS ONE* *6*, e24421.
- 823 Mills, J.D., and Janitz, M. (2012). Alternative splicing of mRNA in the molecular pathology of  
824 neurodegenerative diseases. *Neurobiol. Aging* *33*, 1012.e11–.e24.
- 825 Nakamura, T., Okabe, S., Yoshida, H., Iida, K., Ma, Y., Sasaki, S., Yamori, T., Shin-ya, K., Nakano,  
826 I., Nagasawa, K., et al. (2017). Targeting glioma stem cells in vivo by a G-quadruplex-stabilizing  
827 synthetic macrocyclic hexaoxazole. *Sci Rep* *7*, 3605.

- 828 Naumann, M., Pal, A., Goswami, A., Lojewski, X., Japtok, J., Vehlouw, A., Naujock, M., Günther, R.,  
829 Jin, M., Stanslowsky, N., et al. (2018). Impaired DNA damage response signaling by FUS-NLS  
830 mutations leads to neurodegeneration and FUS aggregate formation. *Nature Communications* 9, 335.
- 831 Nizamutdinov, D., Stock, E.M., Dandashi, J.A., Vasquez, E.A., Mao, Y., Dayawansa, S., Zhang, J.,  
832 Wu, E., Fonkem, E., and Huang, J.H. (2018). Prognostication of Survival Outcomes in Patients  
833 Diagnosed with Glioblastoma. *World Neurosurg* 109, e67–e74.
- 834 Paronetto, M.P., Miñana, B., and Valcárcel, J. (2011). The Ewing sarcoma protein regulates DNA  
835 damage-induced alternative splicing. *Mol. Cell* 43, 353–368.
- 836 Prados, M.D., Byron, S.A., Tran, N.L., Phillips, J.J., Molinaro, A.M., Ligon, K.L., Wen, P.Y., Kuhn,  
837 J.G., Mellinghoff, I.K., de Groot, J.F., et al. (2015). Toward precision medicine in glioblastoma: the  
838 promise and the challenges. *Neuro-Oncology* 17, 1051–1063.
- 839 R, S., WP, M., van den Bent MJ, M, W., B, F., MJ, T., K, B., AA, B., C, M., U, B., et al. (2005).  
840 Radiotherapy plus Concomitant and Adjuvant Temozolomide for Glioblastoma. *New England Journal*  
841 *of Medicine* 987–996.
- 842 Robers, M.B., Dart, M.L., Woodroffe, C.C., Zimprich, C.A., Kirkland, T.A., Machleidt, T., Kupcho,  
843 K.R., Levin, S., Hartnett, J.R., Zimmerman, K., et al. (2015). Target engagement and drug residence  
844 time can be observed in living cells with BRET. *Nature Communications* 6, 10091.
- 845 Sahakyan, A.B., Chambers, V.S., Marsico, G., Santner, T., Di Antonio, M., and Balasubramanian, S.  
846 (2017). Machine learning model for sequence-driven DNA G-quadruplex formation. *Sci Rep* 7, 14535.
- 847 Sakashita, E., and Endo, H. (2010). SR and SR-related proteins redistribute to segregated fibrillar  
848 components of nucleoli in a response to DNA damage. *Nucleus* 1, 367–380.
- 849 Seiler, M., Yoshimi, A., Darman, R., Chan, B., Keaney, G., Thomas, M., Agrawal, A.A., Caleb, B.,  
850 Csibi, A., Sean, E., et al. (2018). H3B-8800, an orally available small-molecule splicing modulator,  
851 induces lethality in spliceosome-mutant cancers. *Nat. Med.* 24, 497–504.
- 852 Shepard, P.J., and Hertel, K.J. (2009). The SR protein family. *Genome Biol.* 10, 242.
- 853 Siddiqui-Jain, A., Grand, C.L., Bearss, D.J., and Hurley, L.H. (2002). Direct evidence for a G-  
854 quadruplex in a promoter region and its targeting with a small molecule to repress c-MYC  
855 transcription. *Proc. Natl. Acad. Sci. U.S.A.* 99, 11593–11598.
- 856 Siegel, R.L., Miller, K.D., and Jemal, A. (2019). Cancer statistics, 2019. *CA Cancer J Clin* 69, 7–34.
- 857 Simone, R., Balendra, R., Moens, T.G., Preza, E., Wilson, K.M., Heslegrave, A., Woodling, N.S.,  
858 Niccoli, T., Gilbert-Jaramillo, J., Abdelkarim, S., et al. (2018). G-quadruplex-binding small molecules  
859 ameliorate C9orf72 FTD/ALS pathology in vitro and in vivo. *EMBO Mol Med* 10, 22–31.
- 860 Stamatopoulou, V., Parisot, P., De Vleeschouwer, C., and Lafontaine, D.L.J. (2018). Use of the iNo  
861 score to discriminate normal from altered nucleolar morphology, with applications in basic cell biology  
862 and potential in human disease diagnostics. *Nat Protoc* 13, 2387–2406.

- 863 Stoddart, L.A., Johnstone, E.K.M., Wheal, A.J., Goulding, J., Robers, M.B., Machleidt, T., Wood,  
864 K.V., Hill, S.J., and Pflieger, K.D.G. (2015). Application of BRET to monitor ligand binding to  
865 GPCRs. *Nat. Methods* *12*, 661–663.
- 866 Svetoni, F., Caporossi, D., and Paronetto, M.P. (2014). Oxidative stress affects FET proteins  
867 localization and alternative pre-mRNA processing in cellular models of ALS. *Free Radic. Biol. Med.*  
868 *75 Suppl 1*, S51.
- 869 Svetoni, F., Frisone, P., and Paronetto, M.P. (2016). Role of FET proteins in neurodegenerative  
870 disorders. *RNA Biol* *13*, 1089–1102.
- 871 Takahama, K., Kino, K., Arai, S., Kurokawa, R., and Oyoshi, T. (2011). Identification of Ewing's  
872 sarcoma protein as a G-quadruplex DNA- and RNA-binding protein. *Febs J.* *278*, 988–998.
- 873 Tang, A.D., Soulette, C.M., van Baren, M.J., bioRxiv, K.H., 2018 Full-length transcript  
874 characterization of SF3B1 mutation in chronic lymphocytic leukemia reveals downregulation of  
875 retained introns. *Biorxiv.org*
- 876 .
- 877 Tavares, F.X., Boucheron, J.A., Dickerson, S.H., Griffin, R.J., Preugschat, F., Thomson, S.A., Wang,  
878 T.Y., and Zhou, H.-Q. (2004). N-Phenyl-4-pyrazolo[1,5-b]pyridazin-3-ylpyrimidin-2-amines as potent  
879 and selective inhibitors of glycogen synthase kinase 3 with good cellular efficacy. *J. Med. Chem.* *47*,  
880 4716–4730.
- 881 Tentori, L., and Graziani, G. (2009). Recent approaches to improve the antitumor efficacy of  
882 temozolomide. *Curr. Med. Chem.* *16*, 245–257.
- 883 Tiek, D.M., Rone, J.D., Graham, G.T., Pannkuk, E.L., Haddad, B.R., and Riggins, R.B. (2018).  
884 Alterations in Cell Motility, Proliferation, and Metabolism in Novel Models of Acquired  
885 Temozolomide Resistant Glioblastoma. *Sci Rep* *8*, 7222.
- 886 Tiek, D.M., Rone, J.D., Graham, G.T., Pannkuk, E.L., Haddad, B.R., and Riggins, R.B. (2017).  
887 Alterations in Cell Motility, Proliferation, and Metabolism in Novel Models of Acquired  
888 Temozolomide Resistant Glioblastoma. *bioRxiv*.
- 889 Trincado, J.L., Entizne, J.C., Hysenaj, G., Singh, B., Skalic, M., Elliott, D.J., and Eyra, E. (2018).  
890 SUPPA2: fast, accurate, and uncertainty-aware differential splicing analysis across multiple  
891 conditions. *Genome Biol.* *19*, 40.
- 892 Vanderbeek, A.M., Rahman, R., Fell, G., Ventz, S., Chen, T., Redd, R., Parmigiani, G., Cloughesy,  
893 T.F., Wen, P.Y., Trippa, L., et al. (2018). The clinical trials landscape for glioblastoma: is it adequate  
894 to develop new treatments? *Neuro-Oncology* *20*, 1034–1043.
- 895 Vasta, J.D., Corona, C.R., Wilkinson, J., Zimprich, C.A., Hartnett, J.R., Ingold, M.R., Zimmerman, K.,  
896 Machleidt, T., Kirkland, T.A., Huwiler, K.G., et al. (2018). Quantitative, Wide-Spectrum Kinase  
897 Profiling in Live Cells for Assessing the Effect of Cellular ATP on Target Engagement. *Cell Chem*  
898 *Biol* *25*, 206–214.e211.

- 899 Wells, C.I., Kapadia, N.R., Couñago, R.M., and Drewry, D.H. (2018). In depth analysis of kinase cross  
900 screening data to identify chemical starting points for inhibition of the Nek family of kinases.  
901 *Medchemcomm* 9, 44–66.
- 902 Wen, P.Y., and Kesari, S. (2008). Malignant gliomas in adults. *N. Engl. J. Med.* 359, 492–507.
- 903 Zhang, J., Stevens, M.F.G., and Bradshaw, T.D. (2012). Temozolomide: mechanisms of action, repair  
904 and resistance. *Curr Mol Pharmacol* 5, 102–114.
- 905

# Figure 1

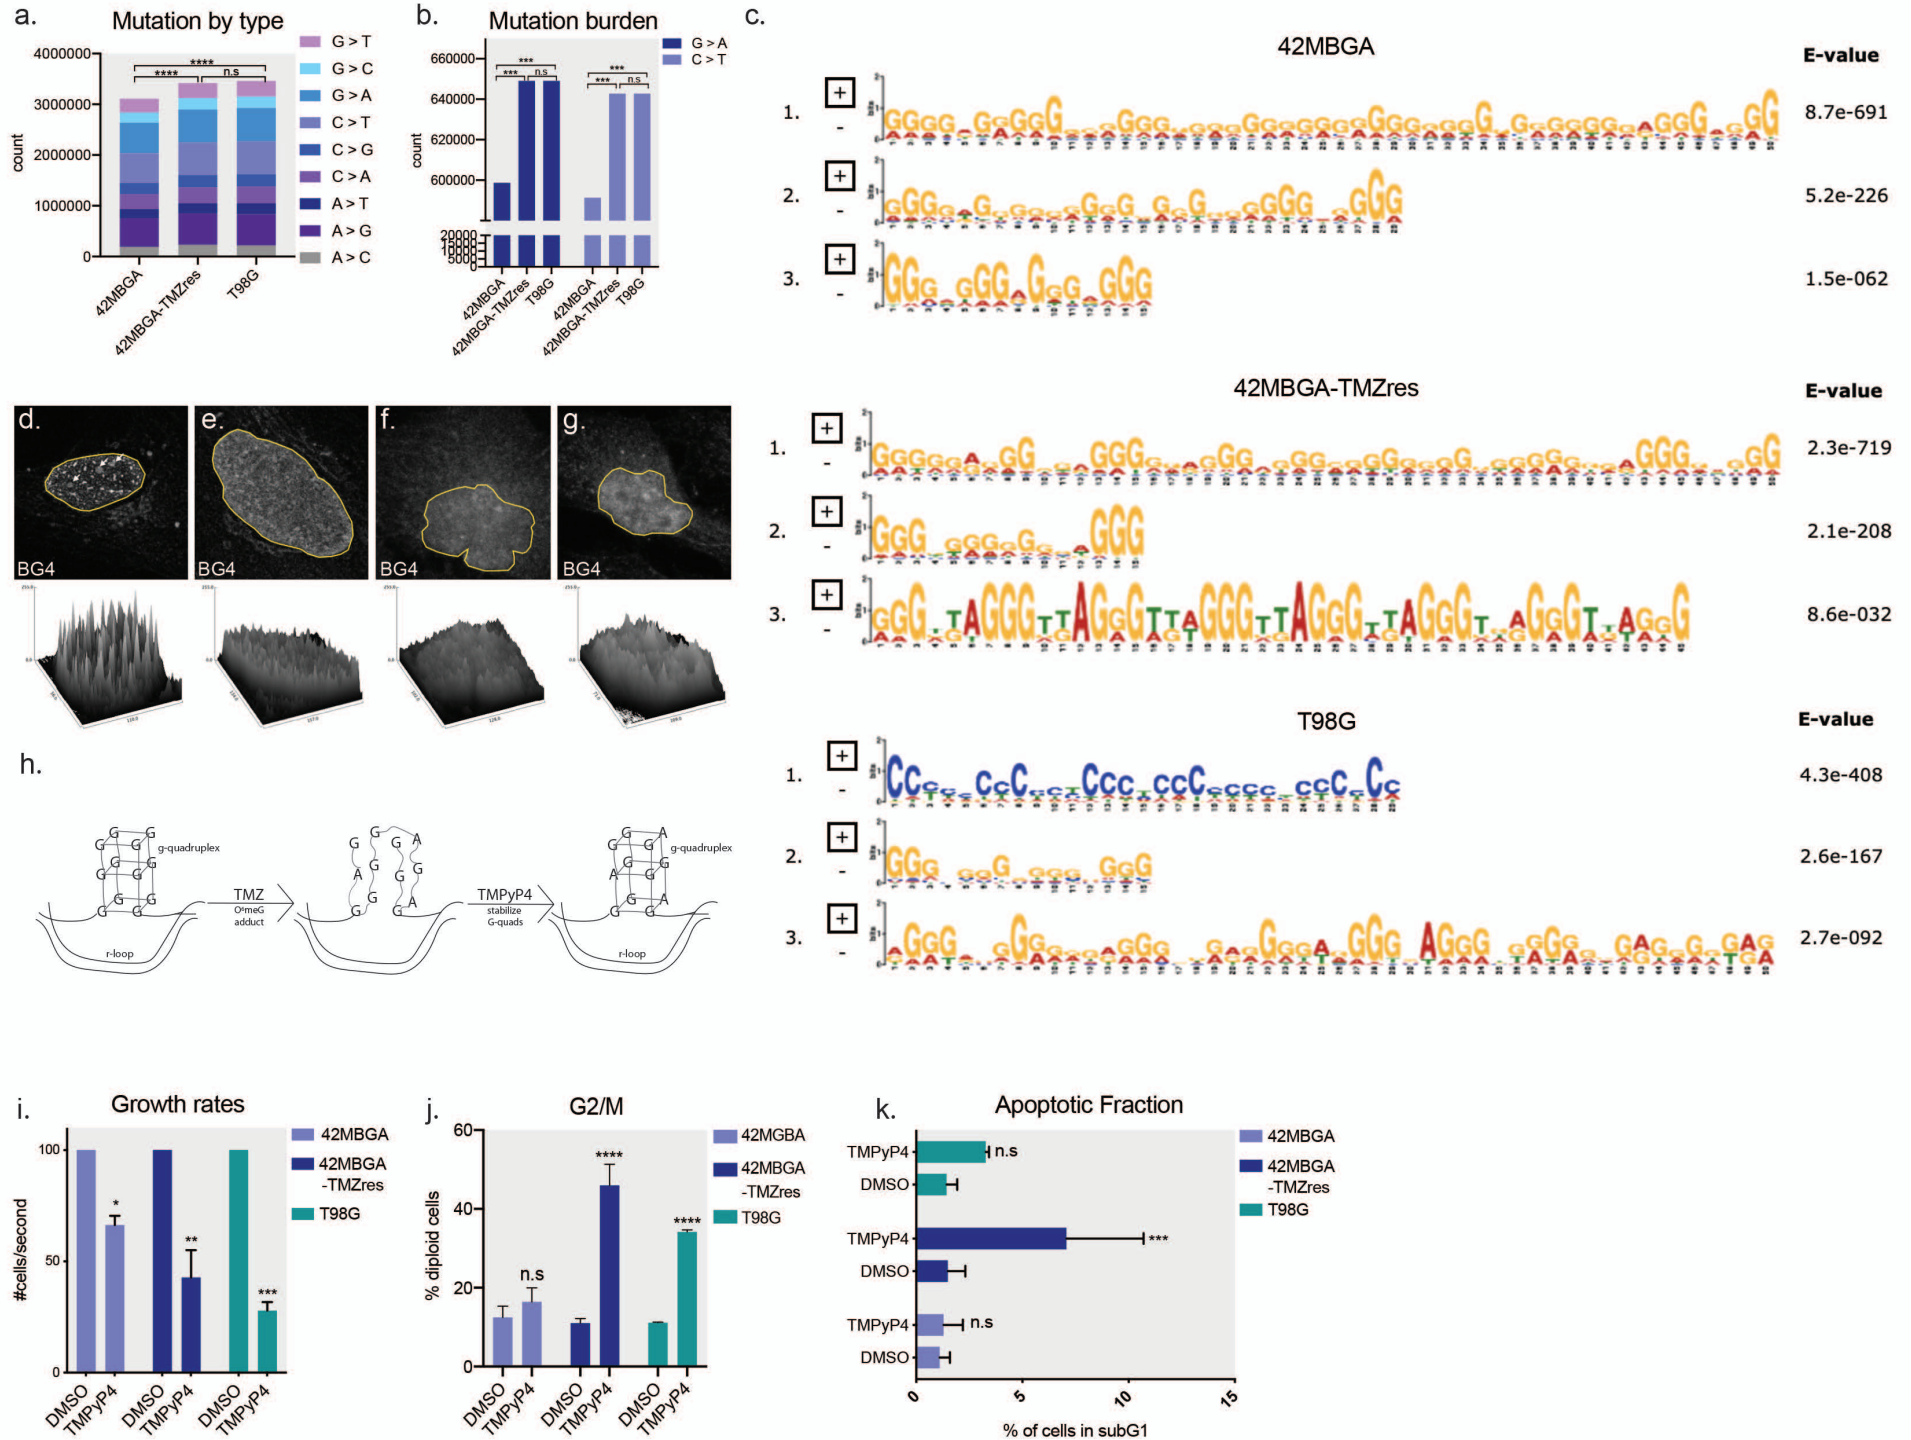

Figure 2

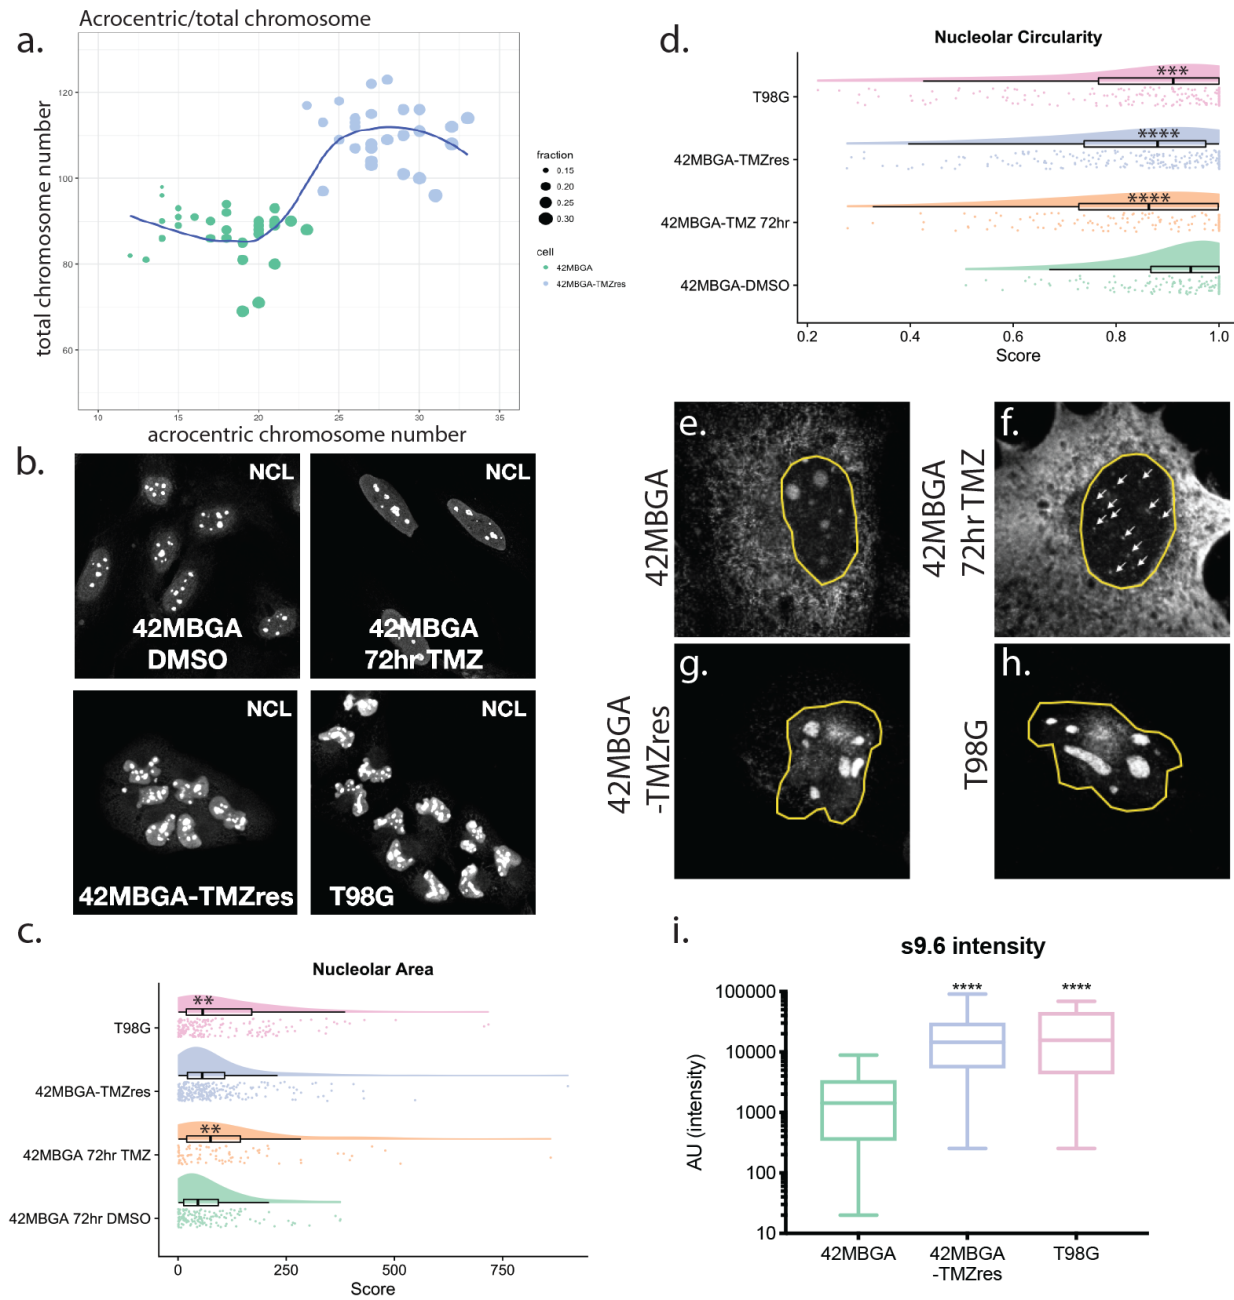

Figure 3

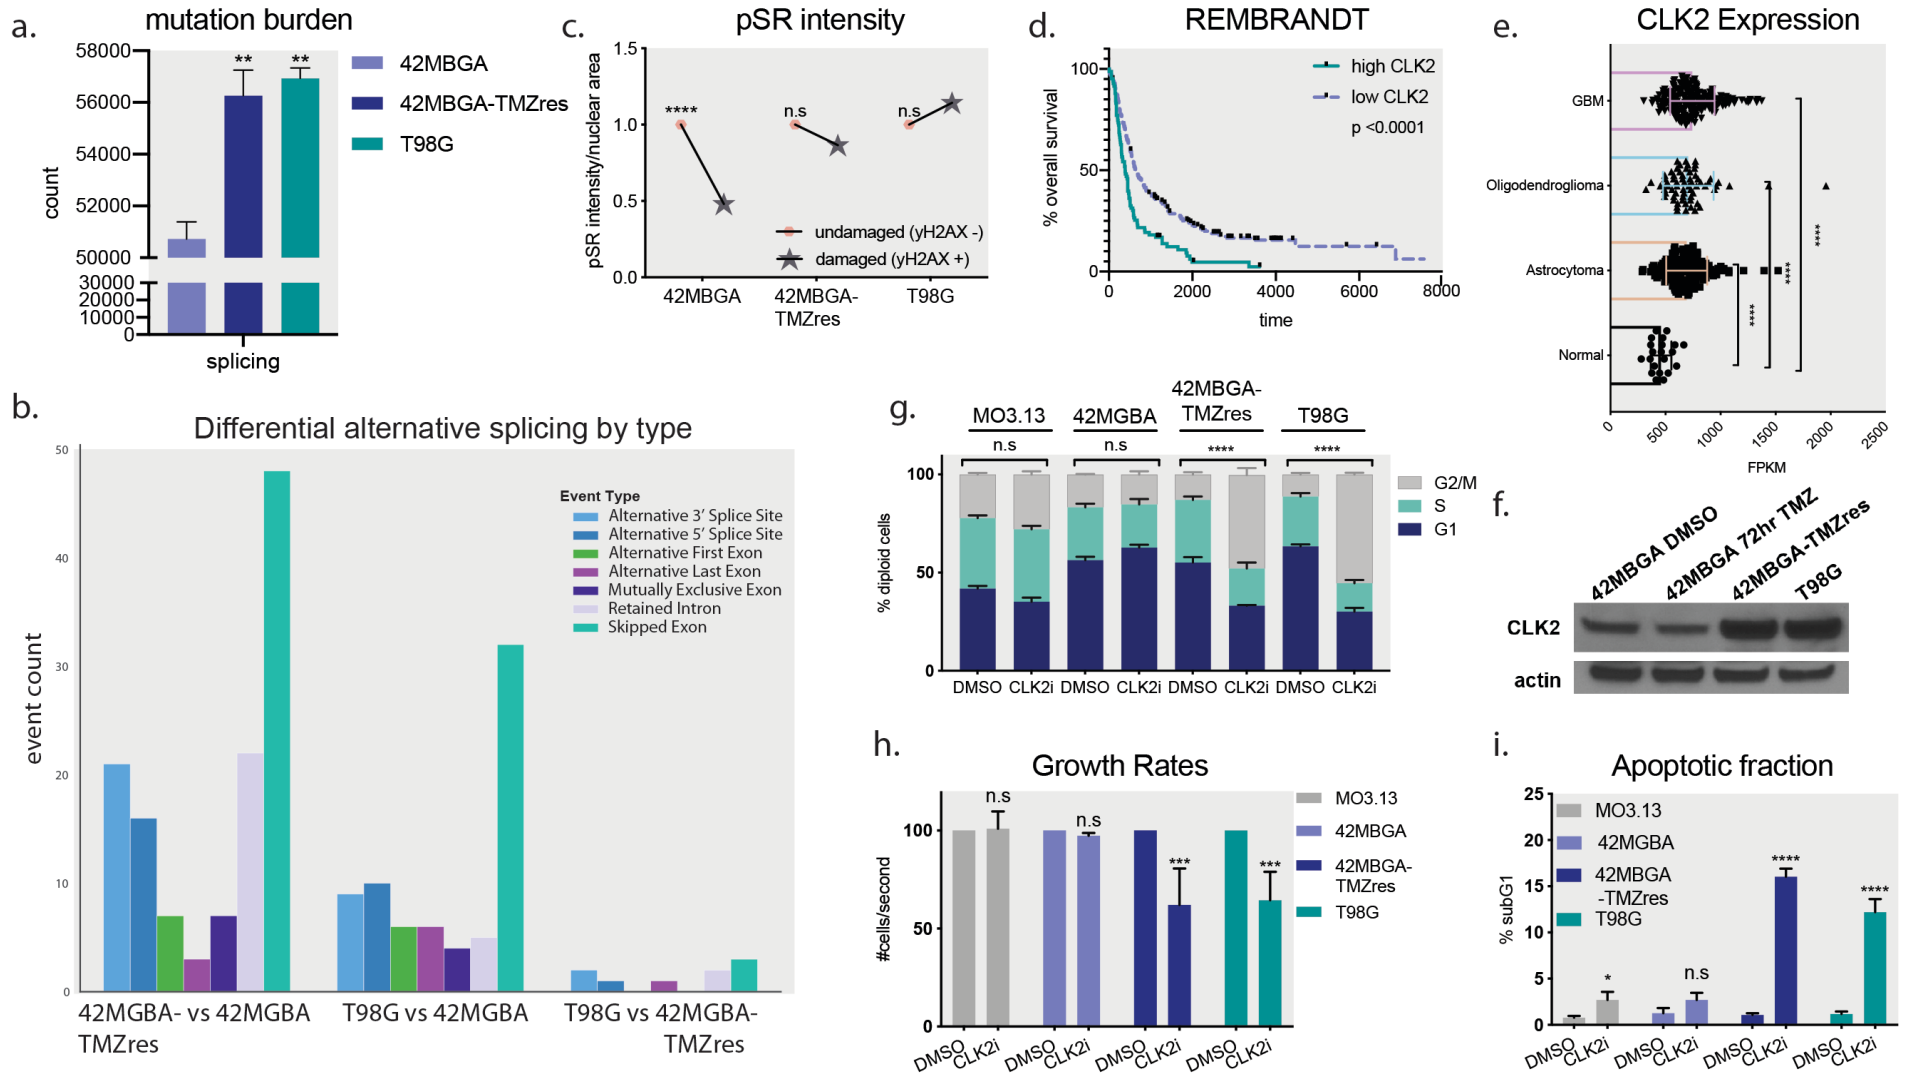



Figure 4

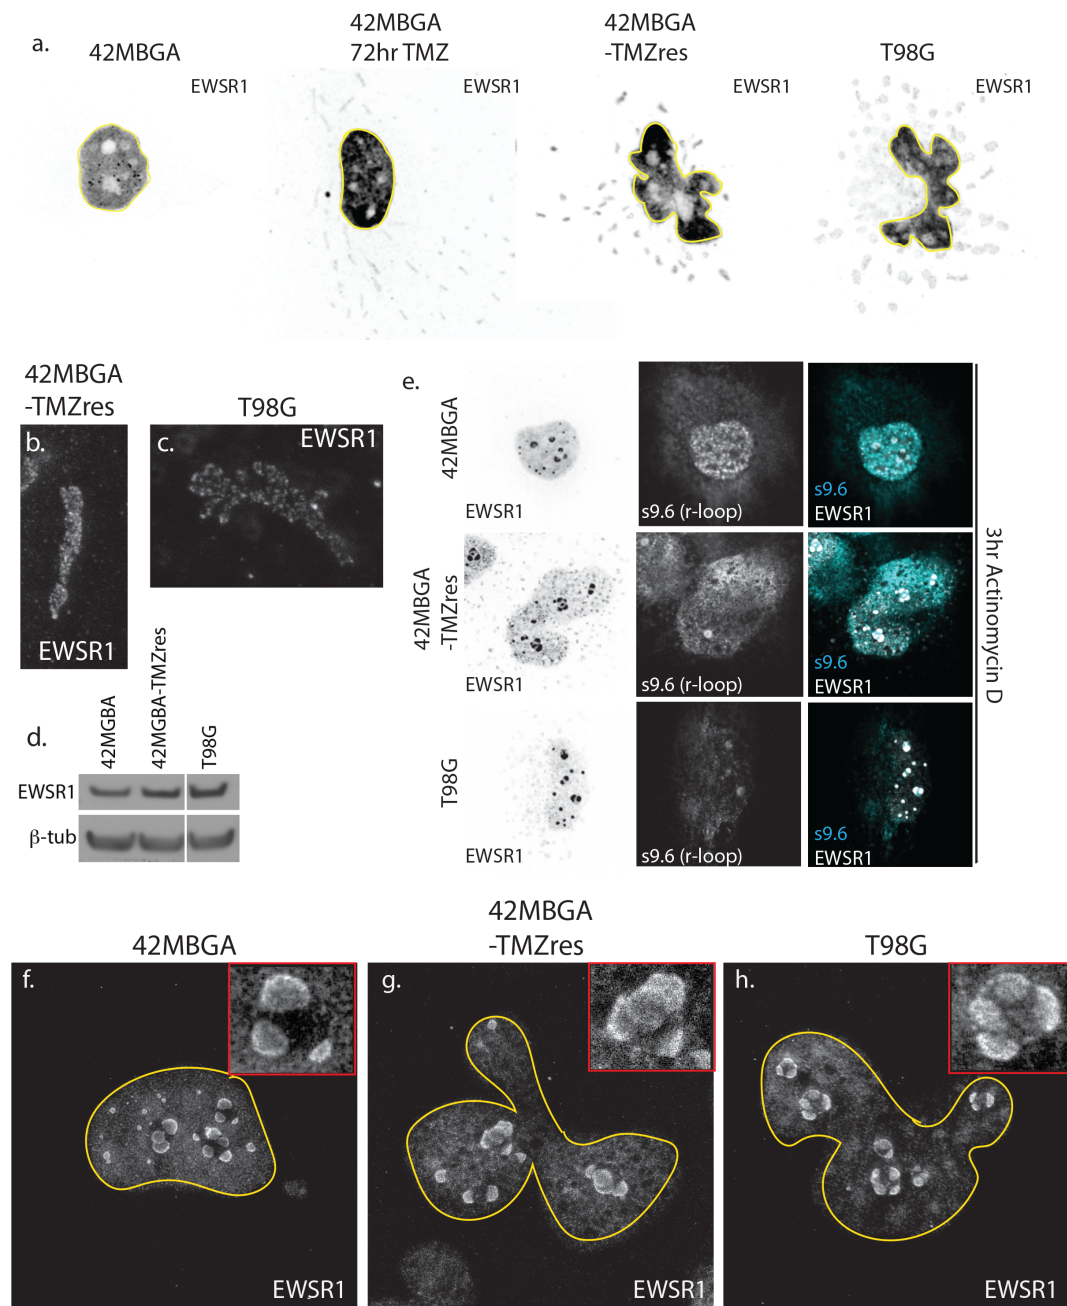

Figure 5

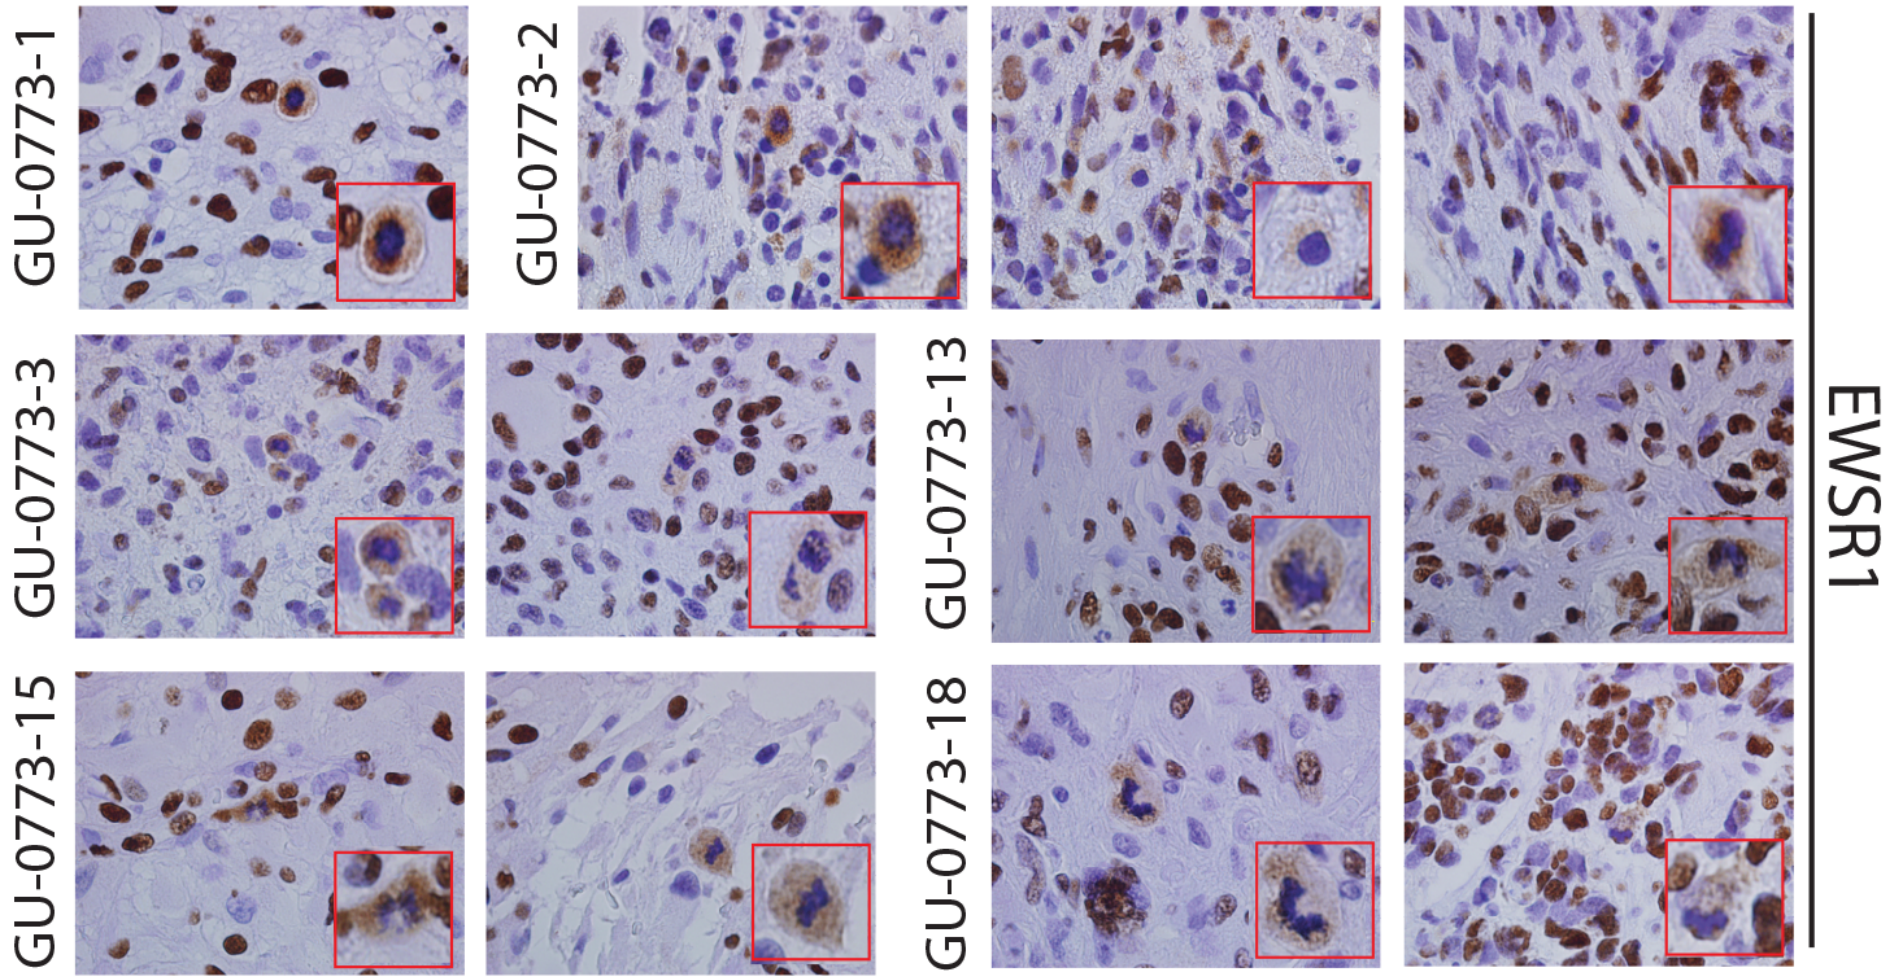

Source: https://www.biorxiv.org/content/10.1101/661660v1.full.pdf
